# Supplementary material
Source: HighWire-hosted journal article supplement (https://bmjopen.bmj.com/content/14/4/e076451)
Supplement: inline-supplementary-material-2 [file inline-supplementary-material-2.pdf]

Appendix 2: Data Extraction Table of All Included Studies

| Study<br>(Title/Author/Year)                                                                                                                                                                                                                                                                                                  | C<br>o<br>u<br>n<br>t<br>r<br>y | Design                                           | Aim                                                                                                                                                                                                                                 | Setting, Participants and<br>Study Dates                                                                                                                                                                                    | Data Collection                                                                                                                                                                                                                                                                                                                                                                                                                                                                                                                                                                                                                                       | Exposure                                     | Results and Main Outcomes                                                                                                                                                                                                                                                                                                                                                                                                                                                                                                                                                                         | Methodological Appraisal                                                                                                                                                                                                                                                                                                                                                                                                                                                                                                                                                                                                                |
|-------------------------------------------------------------------------------------------------------------------------------------------------------------------------------------------------------------------------------------------------------------------------------------------------------------------------------|---------------------------------|--------------------------------------------------|-------------------------------------------------------------------------------------------------------------------------------------------------------------------------------------------------------------------------------------|-----------------------------------------------------------------------------------------------------------------------------------------------------------------------------------------------------------------------------|-------------------------------------------------------------------------------------------------------------------------------------------------------------------------------------------------------------------------------------------------------------------------------------------------------------------------------------------------------------------------------------------------------------------------------------------------------------------------------------------------------------------------------------------------------------------------------------------------------------------------------------------------------|----------------------------------------------|---------------------------------------------------------------------------------------------------------------------------------------------------------------------------------------------------------------------------------------------------------------------------------------------------------------------------------------------------------------------------------------------------------------------------------------------------------------------------------------------------------------------------------------------------------------------------------------------------|-----------------------------------------------------------------------------------------------------------------------------------------------------------------------------------------------------------------------------------------------------------------------------------------------------------------------------------------------------------------------------------------------------------------------------------------------------------------------------------------------------------------------------------------------------------------------------------------------------------------------------------------|
| A large outbreak of COVID-19 in a UK prison, October 2020 to April 2021. Adamson, J. P. ;Smith, C. ;Pacchiarini, N. ;Connor, T. R. ;Wallsgrave, J. ;Coles, I. ;Frost, C. ;Edwards, A. ;Moore, C. ;Sinha, J. ;Perrett, S. ;Craddock, C. ;Sawyer, C. ;Waldram, A. ;Barrasa, A. ;Thomas, D. R. ;Daniels, P. ;Lewis, H. 2022 (41) | U<br>K                          | Report, retrospe<br>ctive<br>analysis<br>of data | Inferred aim: to describe an outbreak investigation of COVID-19 and infection control measures implemented to limit COVID-19 transmission, morbidity and mortality) in a large male prison in Wales, UK, October 2020 to April 2021 | Large male prison in Wales, UK. (1700 male residents, 850 staff, 453 total COVID-19 cases) October 2020 to April 2021                                                                                                       | Exact method of data collection not documented. Inferred that data collected in-house for appraisal by Outbreak Control Team on weekly basis. Case data were managed using an Excel line list containing demographic information (age, sex), staff residence postcode, resident cell number, work areas/dates, laboratory results (test dates, result status, laboratory IDs, whole-genome sequencing (WGS links), interview dates/notes and resident prison-transfer dates Line list management was performed by a single member of staff, in frequent contact with prison, 'Test, Trace, Protect' (TTP – contact tracing) and laboratory colleagues | Being in prison during the COVID-19 pandemic | Crude attack rate in residents 12% (95% CI 9–15%). Period-incidence of 60.4 cases per 1000 population for residents, lower than that of general population. Case hospitalisation ratio was 0.06 for residents.                                                                                                                                                                                                                                                                                                                                                                                    | Small sample size. Only male residents therefore not generalisable over all populations. No detailed information on testing rates within the institution, attack rates could have been affected by testing policy - residents had to report symptoms and request a test. No information regarding uptake rates of asymptomatic testing. Residents might also have been reluctant to report symptoms knowing this would incur cell-isolation. No detailed description of data collection.                                                                                                                                                |
| A study of SARS-COV-2 outbreaks in US federal prisons: the linkage between staff, incarcerated populations, and community transmission Towers, S. ;Wallace, D. ;Walker, J. ;Eason, J. M. ;Nelson, J. R. ;Grubestic, T. H. 2022 (37)                                                                                           | U<br>S<br>A                     | Retrospe<br>ctive<br>analysis<br>of data         | To examine rates of SARS-COV-2 in prisons to those in the communities that directly surround them and effects that decarceration has on community transmission of SARS-COV-2                                                        | Data on SARS-COV-2 incidence among incarcerated populations in 101 federal prisons 18/05/2020 to 31/01/2021<br><br>Comparative County level data on SARS-COV-2 incidence in the general population 22/01/2020 to 31/01/2021 | Data on SARS-COV-2 incidence among incarcerated populations obtained from the US Federal Bureau of Prisons website.<br><br>Comparative County level data on SARS-COV-2 incidence in the general population obtained from the Johns Hopkins University Coronavirus Resource Centre                                                                                                                                                                                                                                                                                                                                                                     | Being in prison during the COVID-19 pandemic | Incarcerated population showed a comparative 4.42 risk ratio of per capita COVID rates versus the general population (p=<0.001). Significant correlation demonstrated between per capita rates in the outbreaks among the incarcerated population and the community, despite stoppage of visitation over the time period of the study Significant difference in per capita rate demonstrated between levels of Prison security level. Decarceration was significantly associated with a decrease in incarcerated per capita rates during the winter wave (p=0.015) but not during the summer wave | Large sample size, varied samples of socio-economic areas sampled thus data more generalisable. Qualitatively different statistics compared – daily incidence reported in Community data, Serial prevalence noted in Prison data, therefore results extrapolated – caution in interpreting this. No information about testing rates in the incarcerated population reported. Caution in interpretation of results warranted because of potential differing degree of testing protocols between different prisons e.g. – asymptomatic surveillance versus symptomatic. No data on ethnicity/race in incidence/prevalence data documented |
| A time-series analysis of testing and COVID-19 outbreaks in Canadian federal prisons to inform prevention and surveillance efforts, A. Blair, A. Parnia and A. Siddiqi 2021 (29)                                                                                                                                              | C<br>a<br>n<br>a<br>d<br>a      | Report, retrospe<br>ctive<br>analysis<br>of data | To compare data from 50 Canadian prisons facilities on positive tests, case recovery, and death and the general population in each jurisdiction                                                                                     | Estimations of prisoner counts in Canadian prisoners, estimated population to be 13,996 at 85% occupancy, analysis of 50 Canadian facilities between 30 March 2020 and 9 May 2020                                           | Exact prisoner counts not available, so estimations made, data extracted from Correctional Service of Canada website, general population data from statistics Canada population estimates for first quarter of 2020                                                                                                                                                                                                                                                                                                                                                                                                                                   | Being in prison during the COVID-19 pandemic | On average, prisons tested more than the general population (88 per 1000 population compared to 40 per 1000 in public), 64% of prisons recorded fewer tests per 1,000 compared to general population, 6 facilities recorded no testing at all, those who tested more had higher prevalence of COVID-19 (reactive testing), 3% of prison population contracted COVID compared to 0.2% general population estimate,                                                                                                                                                                                 | Does not state whether the prisons which had no testing records did not test, or if they were just not recorded, no documentation of how case fatalities were measured, fatality rates not standardised, total sample size not known as estimations done, confidence intervals not reported, average testing for Canada vs general prison population not reported clearly, seemed to only want to                                                                                                                                                                                                                                       |

|                                                                                                                                                                                                                                                                                                                                                    |                                 |                                                                                                 |                                                                                                                                                                              |                                                                                                                                                                                             |                                                                                                                                                                                                                                                                                                                                                                                                                                                                                                                                               |                                              |                                                                                                                                                                                                                                                                                                                                                                                                                                                                                                                                                                                                                                                                                                                                                                                                                    |                                                                                                                                                                                                                                                                                                                                                                                                                                                                                                                                                                                                                                                                                                                                                                                                                                                                                                                                                                                                                                                                                                         |
|----------------------------------------------------------------------------------------------------------------------------------------------------------------------------------------------------------------------------------------------------------------------------------------------------------------------------------------------------|---------------------------------|-------------------------------------------------------------------------------------------------|------------------------------------------------------------------------------------------------------------------------------------------------------------------------------|---------------------------------------------------------------------------------------------------------------------------------------------------------------------------------------------|-----------------------------------------------------------------------------------------------------------------------------------------------------------------------------------------------------------------------------------------------------------------------------------------------------------------------------------------------------------------------------------------------------------------------------------------------------------------------------------------------------------------------------------------------|----------------------------------------------|--------------------------------------------------------------------------------------------------------------------------------------------------------------------------------------------------------------------------------------------------------------------------------------------------------------------------------------------------------------------------------------------------------------------------------------------------------------------------------------------------------------------------------------------------------------------------------------------------------------------------------------------------------------------------------------------------------------------------------------------------------------------------------------------------------------------|---------------------------------------------------------------------------------------------------------------------------------------------------------------------------------------------------------------------------------------------------------------------------------------------------------------------------------------------------------------------------------------------------------------------------------------------------------------------------------------------------------------------------------------------------------------------------------------------------------------------------------------------------------------------------------------------------------------------------------------------------------------------------------------------------------------------------------------------------------------------------------------------------------------------------------------------------------------------------------------------------------------------------------------------------------------------------------------------------------|
|                                                                                                                                                                                                                                                                                                                                                    |                                 |                                                                                                 |                                                                                                                                                                              |                                                                                                                                                                                             |                                                                                                                                                                                                                                                                                                                                                                                                                                                                                                                                               |                                              | case fatality was 0.6% in prisons compared to estimated 10% in general population                                                                                                                                                                                                                                                                                                                                                                                                                                                                                                                                                                                                                                                                                                                                  | report statistics that showed poor testing in prisons (reporting bias)                                                                                                                                                                                                                                                                                                                                                                                                                                                                                                                                                                                                                                                                                                                                                                                                                                                                                                                                                                                                                                  |
| Adverse SARS-CoV-2-associated outcomes among people experiencing social marginalisation and psychiatric vulnerability: A population-based cohort study among 4.4 million people . Nilsson, Sandra Feodor ;Laursen, Thomas Munk ;Osler, Merete ;Hjorthøj, Carsten ;Benros, Michael E. ;Ethelberg, Steen ;Molbak, Kare ;Nordentoft, Merete 2022 (42) | D<br>e<br>n<br>m<br>a<br>r<br>k | Populati<br>on<br>based<br>Cohort<br>study<br>using<br>retrospe<br>ctive<br>analysis<br>of data | The study aimed to assess whether being a part of a socially marginalised group was associated with SARS-CoV-2 infection-related adverse outcomes                            | Study assessed people experiencing incarceration, as part of a 4,412,382 total population cohort size assessing individuals in marginalised groups over the period 27/02/2020 to 15/10/2021 | Data on imprisonments was obtained from the Danish Central Criminal Register, 1991-2020, and information on imprisonment was included for the period 2018-2020. PCR-test data were provided through the National Danish Microbiology Database (MiBa). Information on follow-up mortality was provided from the Civil Registration System                                                                                                                                                                                                      | Being in prison during the COVID-19 pandemic | <p>The study demonstrated increased risks of adverse outcomes over all assessed domains: aIRR (versus general population) Hospitalisation within 14 days of COVID diagnosis 1.99 (1.65-2.40 p=&lt;0.0001), Intensive Care Admission within 14 days of COVID diagnosis 2.41 (1.56-3.72 p=0.00050) Death within 60 days of COVID diagnosis 3.11 (1.93-5.03 p=&lt;0.0001) Rate of All Cause Mortality over study period 9.44 (95% CI 6.43-13.88 p=&lt;.0001) in prison residents with COVID-19 infection versus 4.00 (95% CI 3.87-4.13 p=&lt;.0001) in the general population with COVID-19 infection.</p> <p>Study noted reduced risk of positive PCR test in PEI versus general population: aIRR 0.84 (95% CI 0.80-0.88) p &lt;0.0001, as well as reduced rate of testing in PEI OR 0.47 (0.46-0.48) &lt;0.0001</p> | Large sample size including the entirety of the Danish Prison population. Data on imprisonment included for 2018-2020 period, whereas study period extended into 2021 therefore some caution in interpretation of data required here. Multiple regression adjustment models described including unadjusted, adjustment for country of birth, living area and vaccination against SARS-CoV-2 infection and further additional adjustment for other included marginalised groups. Note population data may include some citizens aged 15-18 but prison population aged 15-18 likely to be negligible based on separately reported prison demographics. No information as to the screening protocols within Danish prison institutions, therefore testing rates/asymptomatic versus symptomatic testing protocols may affect the rates of COVID-19 infection detected and thus affect outcome risks. Reduced positive PCR rate may be artefact of reduced testing rate in prison, rather than reduced burden of disease within prison facilities. No demographic data of the prison population documented. |
| Age and COVID-19 mortality in the United States: a comparison of the prison and general population. Nowotny, K. ;Metheny, H. ;LeMasters, K. ;Brinkley-Rubinstein, L 2022 (60)                                                                                                                                                                      | U<br>S<br>A                     | Retrospe<br>ctive<br>analysis<br>of data                                                        | The study aims to compare COVID-19 mortality trends in the US prison population and the general population to see how mortality risk changed over the course of the pandemic | Study assessed COVID-19 data for 53 prison systems including the 50 states totalling 1,414,200 individuals. Study duration was 25/04/2020 to 05/06/2021                                     | Data sourced from publicly available sets (Covid Prison Project for aggregate data set examining COVID-19 in correctional facilities, CDC and National Center for Health Statistics morbidity and mortality weekly reports [MMWR] for COVID-19 death counts by age, sex and week, Bureau of Justice Statistics (BJS) for prisoner data, US Census used for general population demographic information) Texas state specific information sourced from TX Department of Criminal Justice, TX Population Estimates Program and The Texas Tribune | Being in prison during the COVID-19 pandemic | Study demonstrated an increased standardized mortality ratio of 2.89 (95%CI 2.78, 3.00) in the prison population versus general population and that prison residents died at younger ages than the general population. In the Texas state case study, the overall adjusted mortality rate for the prison population was 11.18 per 1,000 versus 6.03 in the general                                                                                                                                                                                                                                                                                                                                                                                                                                                 | Large sample covering prison population of 50 US states. Mortality data reported from the Departments of Correction – deaths may be under-reported. No demographic data included in mortality statistics. Age stratification differed between data sources so artificial aggregation performed by study team                                                                                                                                                                                                                                                                                                                                                                                                                                                                                                                                                                                                                                                                                                                                                                                            |

|                                                                                                                                                                                                                                  |                       |                                               |                                                                                                                                                                                                                                                                                                                                 |                                                                                                                                                                                                                                                          |                                                                                                                                                                                                                                                                                                                                                                                                                                                                                                          |                                              |                                                                                                                                                                                                                                                                                                                                                                                                                                                                                                                                                                     |                                                                                                                                                                                                                                                                                                                                                                                                                                                                                                                                                                                                                                                                                                                                                                                                                                                                    |
|----------------------------------------------------------------------------------------------------------------------------------------------------------------------------------------------------------------------------------|-----------------------|-----------------------------------------------|---------------------------------------------------------------------------------------------------------------------------------------------------------------------------------------------------------------------------------------------------------------------------------------------------------------------------------|----------------------------------------------------------------------------------------------------------------------------------------------------------------------------------------------------------------------------------------------------------|----------------------------------------------------------------------------------------------------------------------------------------------------------------------------------------------------------------------------------------------------------------------------------------------------------------------------------------------------------------------------------------------------------------------------------------------------------------------------------------------------------|----------------------------------------------|---------------------------------------------------------------------------------------------------------------------------------------------------------------------------------------------------------------------------------------------------------------------------------------------------------------------------------------------------------------------------------------------------------------------------------------------------------------------------------------------------------------------------------------------------------------------|--------------------------------------------------------------------------------------------------------------------------------------------------------------------------------------------------------------------------------------------------------------------------------------------------------------------------------------------------------------------------------------------------------------------------------------------------------------------------------------------------------------------------------------------------------------------------------------------------------------------------------------------------------------------------------------------------------------------------------------------------------------------------------------------------------------------------------------------------------------------|
| Anxiety during the COVID-19 pandemic in prisoners who had high risks to suffer from mood disorders: A longitudinal study before and during the COVID-19 Zhang, S. ;He, J. ;Yang, Q. ;Du, Y. ;Xiao, W. ;Gao, J. ;Li, H. 2022 (77) | C<br>h<br>i<br>n<br>a | Longitudi<br>nal study<br>via<br>survey       | The study aimed to compare the anxiety levels in prisoners before and after the COVID-19 outbreak and analyse the causes of the changes in anxiety                                                                                                                                                                              | The study included a longitudinal cohort consisted of 803 prison residents, at an unspecified all-male Chinese prison. There were two survey time points October 2019 to November 2019 (T0) and March 2020 to April 2020 (T1)                            | Data came from a two time point survey (T1&T0) assessing PHQ-9, GAD-7 and Insomnia Severity Index as well as basic demographics collected at the first time point.                                                                                                                                                                                                                                                                                                                                       | Being in prison during the COVID-19 pandemic | The study overall found a significant trend of anxiety scores improving during the pandemic compared with prior to it (p=<0.001). Of the 803 prisoners, 28.6% showed improved GAD-7, 15.9% showed worsened scores. The study also demonstrated significantly increased anxiety levels during the pandemic in those who did not have anxiety prior to the pandemic (p=<0.001 n = 480) whilst showing improved anxiety scores for those who were suffering from anxiety pre-pandemic (p=<0.001 n = 323).                                                              | Longitudinal study.Good response rate to survey - 88.6% prison population completing T0 survey and 93.2% of subsequent cohort completing follow up T1 survey. Validated mental health score instruments used. Study Pandemic time point (T1) very early on (March – April 2020) in the pandemic time course, therefore unclear whether trend of improved anxiety is true reflection of whole pandemic period. Very small sample size, based at one prison only therefore not generalisable to entire country or worldwide population. Only male prison residents surveyed. Only pre/during pandemic comparison, no general population comparison. Patients with "severe mental illnesses (e.g., schizophrenia and mental retardation " excluded – unclear the exact definitions and basis of this exclusion PHQ-9, GAD-7 and ISI PROs prone to repeat testing bias |
| Assessing the Mortality Impact of the COVID-19 Pandemic in Florida State Prisons, N. M. Marquez, A. Littman, V. Rossi, M. Everett, E. Tyagi, H. Johnson, et al. 2021 (61)                                                        | U<br>S<br>A           | Retrospe<br>ctive cohort<br>study (pre-print) | 1) document demographic changes that occurred in Florida state prisons during the COVID-19 pandemic 2) assess excess deaths that occurred during the months of the COVID-19 pandemic in 2020 and their temporal relationship to reported COVID 19 deaths 3) quantify changes in overall mortality rate of Florida state prisons | Includes 50 institutions in Florida state prisons with a daily population of over 80,000, administered by Florida department of corrections (FLDOC), 6,830,581 person-months of data was analysed, analysis from 2015-2020                               | Monthly population counts back to January 15 using publicly available inmate population records, mortality is reported by FLDOC but is not standardised to uniform causes of death so are unable to be analysed, covid 19 deaths calculated by taking the difference of cumulative totals month by month, age specific monthly mortality done by collecting monthly data 2015-2019 to build baseline expected mortality rate                                                                             | Being in prison during the COVID-19 pandemic | Total of 2,567 deaths in Florida state prison population over study period, 2020 highest CMR of 654 deaths per 100,000 person-years, 1.56 RR compared to 2019 when using bootstrapping. Monthly median posterior estimates of excess mortality were found to be strongly and significantly correlated with monthly reported deaths related to COVID-19 (80.4%, p <.01), life expectancy decreased by 4.12 years between 2019 and 2020                                                                                                                               | Causes of death are not documented, ie due to COVID? Due to suicide? Aging population? Less likely to receive healthcare because of the pandemic so malignancies/other conditions go unnoticed? also includes data from all of 2020, ie before the covid-19 pandemic hit, mistakes in headings of Table 1                                                                                                                                                                                                                                                                                                                                                                                                                                                                                                                                                          |
| Association Between Prison Crowding and COVID-19 Incidence Rates in Massachusetts Prisons, April 2020-January 2021, A. I. Leibowitz, M. J. Siedner, A. C. Tsai and A. M. Mohareb (32)                                            | U<br>S<br>A           | Longitudi<br>nal ecologic<br>al study         | To estimate the association between prison crowding, community COVID-19 transmission, and prison incidence rates of COVID-19                                                                                                                                                                                                    | Looked at 14/16 Massachusetts state prisons, 2 excluded due to unique turnover levels/availability of on-site medical facilities, the 14 prisons had an average of 6878 people housed during the study period, between 21 April 2020 and 11 January 2020 | Analysis conducted using deidentified, publicly available data sets, Massachusetts department of corrections data for average population for each prison and assess positive COVID tests, Institution Cell Housing reports for data on prisoners in single cells and total number in prison, quarterly reports for design capacity, security level and sex of individuals, novel coronavirus visual dashboard for data on county covid cases, US census bureau for estimates of Massachusetts population | Prison crowding during the pandemic          | Prisons median crowding levels ranged from 25%-155%, COVID-19 incidence was significantly greater in prisons at higher percent of design capacity, IRR 1.14 per 10 percentage point difference, those above 100% capacity, IRR 4.86 compared to those with less than 70%, COVID-19 incidence lower in prisons with higher percent of people in single cell units (IRR 0.82 per 10 percent point difference in single cell occupancy, COVID incidence rate in prisons was 965/100,000 compared to 150/100,000 person weeks in general population during study period | Crude incidence was not standardised when calculated therefore must be interpreted with caution, no demographic data available and confounders not documented, COVID incidence relied on public testing, asymptomatic and untested COVID cases not reported, no comparison of testing levels in the community                                                                                                                                                                                                                                                                                                                                                                                                                                                                                                                                                      |

|                                                                                                                                                                                                                             |             |                                                                         |                                                                                                                                                                                                      |                                                                                                                                                                                                                                                                                                                                            |                                                                                                                                                                                                                                                                                                                                    |                                                           |                                                                                                                                                                                                                                                                                                                                                                                                                                                                                                                                                                                                                                                                                                                                                                                                                                                              |                                                                                                                                                                                                                                                                                                                                                                                                                                                                               |
|-----------------------------------------------------------------------------------------------------------------------------------------------------------------------------------------------------------------------------|-------------|-------------------------------------------------------------------------|------------------------------------------------------------------------------------------------------------------------------------------------------------------------------------------------------|--------------------------------------------------------------------------------------------------------------------------------------------------------------------------------------------------------------------------------------------------------------------------------------------------------------------------------------------|------------------------------------------------------------------------------------------------------------------------------------------------------------------------------------------------------------------------------------------------------------------------------------------------------------------------------------|-----------------------------------------------------------|--------------------------------------------------------------------------------------------------------------------------------------------------------------------------------------------------------------------------------------------------------------------------------------------------------------------------------------------------------------------------------------------------------------------------------------------------------------------------------------------------------------------------------------------------------------------------------------------------------------------------------------------------------------------------------------------------------------------------------------------------------------------------------------------------------------------------------------------------------------|-------------------------------------------------------------------------------------------------------------------------------------------------------------------------------------------------------------------------------------------------------------------------------------------------------------------------------------------------------------------------------------------------------------------------------------------------------------------------------|
| Association of State COVID-19 Vaccination Prioritization With Vaccination Rates Among Incarcerated Persons Biondi, B. E. ;Leifheit, K. M. ;Mitchell, C. R. ;Skinner, A. ;Brinkley-Rubinstein, L. ;Raifman, J. 2022 (73)     | U<br>S<br>A | Longitudi<br>nal study<br>using<br>weekly<br>reported<br>public<br>data | The stated aim of the study was to assess the effect of state vaccination prioritisation policy regarding incarcerated people on the percentage of incarcerated people fully vaccinated for COVID-19 | The study presented data representing a mean population of 690,343 incarcerated residents within 36 US states, collected from 20/10/2020 to 20/06/2021                                                                                                                                                                                     | Vaccination data was collected from the publicly available Marshall Project and Associated Press sources. COVID-19 US State Policy database was used to source vaccination phase data and dates of incarcerated persons' vaccination eligibility.                                                                                  | Being in<br>prison<br>during the<br>COVID-19<br>pandemic  | 21 of the sampled states prioritised vaccination of incarcerated residents. States with policies that prioritised vaccination of incarcerated people had significant increases in vaccination rates compared with other states over time. In states with no prioritisation policy, vaccination rates in the general population were higher than in incarcerated people.                                                                                                                                                                                                                                                                                                                                                                                                                                                                                      | Large sample size in large geographical area. Results reliant on accuracy of publicly available source data. Data represented graphically only in published paper. Data not included for 14 states due to limited publicly reported data and specific to US, therefore conclusions should be extrapolated to other areas with caution. Varied vaccination dosing schedules between states which may effect vaccination rates (single dose versus 2-dose full course vaccines) |
| Characteristics and comparative clinical outcomes of prisoner versus non-prisoner populations hospitalized with COVID-19, Altibi et al 2021 (14)                                                                            | U<br>S<br>A | Retrospe<br>ctive<br>observati<br>onal<br>cohort<br>study               | To report on the characteristics and clinical outcomes of prisoners hospitalised with COVID-19 as compared to non-prisoners                                                                          | Looked at 706 hospitalised COVID-19 patients, 598 were non-prisoners and 108 were prisoners, study took place at 2 Henry Ford Health Systems in Michigan, people who went to A+E but were not admitted were not included in the study, similar admission criteria for both hospitals, between 10 March and 10 May 2020                     | Patient level data collected about imprisonment status, demographic characteristics (age, sex, race), chronic medical conditions, smoking status and obesity, COVID-19 symptoms from patient hospital records, follow up information obtained by contacting patients, families or nursing homes or healthcare staff at prison      | Being in<br>prison<br>during the<br>COVID-19<br>pandemic  | Primary outcomes were intubation rates, in-hospital mortality and 30-day mortality, prisoners had a higher Charlson co-morbidity Index (CCI), higher prevalence of COPD and underlying malignancies, non-prisoners were older, higher prevalence of CKD, obesity and dementia, prisoners had worse clinical signs and later presentation to hospital, higher inflammatory markers at presentation, in hospital mortality was higher for prisoners with an adjusted odds ratio of 2.32 (CI 1.33-4.05 statistically significant) (adjusted for age, sex, race, CCI and obesity), more prisoners required intubation with an OR of 1.86 (CI 1.14-3.03) in multivariable logistic regression was not statistically significant, more prisoners needed vasopressors (statistically significant), higher percentage of prisoners admitted to ICU (not significant) | Full demographic details noted, 2 groups not similar at baseline (prisoners much younger), selection bias as it is an observational study, especially with discrepancy in referral and admission thresholds, potential confounders identified and controlled during analysis, limited to one healthcare system in Michigan, may not be reproducible, findings based on data extraction from hospital records, accuracy down to the reporting from HCP                         |
| Characteristics and outcomes of prisoners hospitalized due to COVID-19 disease, M. Abdalbary, E. Kakani, Y. Ahmed, M. Shea, J. A. Neyra and A. El-Husseini, 2021 (55)                                                       | U<br>S<br>A | Retrospe<br>ctive<br>compara<br>tive<br>cohort<br>study                 | To examine clinical outcome characteristics of prisoners vs non prisoners admitted to hospital due to COVID-19 disease                                                                               | Analysis of consecutive COVID-19 patients admitted to the University of Kentucky Medical Center, adult patients who tested positive for COVID-19 on PCR, total cohort = 86 people, inmates n=37, non-inmates n=49, between 1 March and 1 June 2020 (when there was a high level of prisoners in the hospital)                              | Electronic health records used to obtain clinical details and demographic information, comorbid symptoms, covid signs and symptoms, therapies/interventions, laboratory results and prevalence of CKD judged by eGFR. Collected outcomes of incident AKI, hospital mortality and major adverse kidney events at time of discharge, | Being in<br>prison<br>during the<br>COVID-19<br>pandemic  | Similar symptom presentation except prisoners more likely to present with a fever, length of stay similar across cohort, no difference in need for ICU care/vasopressors/inotropes/mechanical ventilation/ECMO support, incidence of AKI greater in inmates than in the general population but not analysed due to confounders, no significant difference in mortality                                                                                                                                                                                                                                                                                                                                                                                                                                                                                       | Significant differences at baseline across 2 groups, high proportion of black people in the study in comparison to the local Kentucky population, and tended to have higher incidence of AKI, ?eGFR not as accurate in black people than in white people. selection bias, specific period measured when there was a surge of prisoners in the hospital, small sample size                                                                                                     |
| Characteristics of Persons with Secondary Detection of Severe Acute Respiratory Syndrome Coronavirus >=90 days after first detection, New Mexico 2020, J. T. Hicks, S. Das, A. Matanock, A. Griego-Fisher and D. Sosin (51) | U<br>S<br>A | Matched<br>case<br>control<br>study                                     | Inferred aim: to assess characteristics and testing frequency of persons with secondary COVID-19 detection                                                                                           | Compared 315 cases with a positive COVID test >= 90 days post first detection with 945 controls without a positive 2nd test, cases defined as people who had a positive RNA or antigen test after 90 days after symptom onset or first positive test, controls defined as people with a negative COVID test or NO COVID test 90 days after | Conducted by New Mexico Department of Health (NMDOH) using surveillance data, controls randomly selected in a 3:1 ratio, matched on region and collection date of first positive test                                                                                                                                              | Secondary<br>detection of<br>COVID-19<br>after 90<br>days | When adjusted in multivariable model, staff or residents of detention/correction facilities had higher rates of secondary detection (aOR 4.7 CI 1.8-12.1), adjusted for number of COVID-19 tests since positive test, sex, race, DM, could either be re-infection or prolonged positive test however these were not quantified                                                                                                                                                                                                                                                                                                                                                                                                                                                                                                                               | A negative COVID-19 test was NOT needed to determine that people were not still positive after 90 days, therefore some people still could be positive, however as they were not tested it cannot be quantified                                                                                                                                                                                                                                                                |

|                                                                                                                                                                                                    |             |                                                                                  |                                                                                                                                                                                                                                   |                                                                                                                                                                                                                                                                                                                                                                  |                                                                                                                                                                                                                                                                                                                                   |                                              |                                                                                                                                                                                                                                                                                                                                                                                                                                                                                                                                                                  |                                                                                                                                                                                                                                                                                                                                                                                                                                                                                                                                                                                                                                                                                                                                                                                                                                 |
|----------------------------------------------------------------------------------------------------------------------------------------------------------------------------------------------------|-------------|----------------------------------------------------------------------------------|-----------------------------------------------------------------------------------------------------------------------------------------------------------------------------------------------------------------------------------|------------------------------------------------------------------------------------------------------------------------------------------------------------------------------------------------------------------------------------------------------------------------------------------------------------------------------------------------------------------|-----------------------------------------------------------------------------------------------------------------------------------------------------------------------------------------------------------------------------------------------------------------------------------------------------------------------------------|----------------------------------------------|------------------------------------------------------------------------------------------------------------------------------------------------------------------------------------------------------------------------------------------------------------------------------------------------------------------------------------------------------------------------------------------------------------------------------------------------------------------------------------------------------------------------------------------------------------------|---------------------------------------------------------------------------------------------------------------------------------------------------------------------------------------------------------------------------------------------------------------------------------------------------------------------------------------------------------------------------------------------------------------------------------------------------------------------------------------------------------------------------------------------------------------------------------------------------------------------------------------------------------------------------------------------------------------------------------------------------------------------------------------------------------------------------------|
|                                                                                                                                                                                                    |             |                                                                                  |                                                                                                                                                                                                                                   | first covid test, extracted on 10 December 2020                                                                                                                                                                                                                                                                                                                  |                                                                                                                                                                                                                                                                                                                                   |                                              |                                                                                                                                                                                                                                                                                                                                                                                                                                                                                                                                                                  |                                                                                                                                                                                                                                                                                                                                                                                                                                                                                                                                                                                                                                                                                                                                                                                                                                 |
| County jails' responses to COVID-19: Practices, procedures, and provisions of behavioural health services<br>Comartin, E. B. ;Victor, G. ;Ray, B. ;Nelson, V. ;Whitehead, T. ;Kubiak, S. 2022 (74) | U<br>S<br>A | Longitudi<br>nal study<br>using<br>surveys<br>on<br>admissio<br>n to<br>facility | The inferred aim of the relevant part of the study was to present the demographics and mental health outcomes in the population of the case-study jail and how these evolved from pre-pandemic and throughout the pandemic itself | The relevant data presented by the study was collected as part of a larger ongoing study, at one rural county jail located in Michigan, USA representing a total of 386 individuals over three time periods - Immediately prior to the pandemic "Winter" (15/02/2020 to 14/03/2020), "Spring" (15/03/2020 to 30/05/2020) and "Summer" (31/05/2020 to 01/08/2020) | Data was collected via information captured by prison staff on booking and a survey completed by residents at that time. Significant mental illness was defined by a score of ≥9/24 on the Kessler-6 (K6) scale, a screening tool for significant mental illness validated in a prison context                                    | Being in jail during the COVID-19 pandemic   | The study demonstrated that the rates of significant mental illness in residents were significantly higher during the early pandemic "spring" period (40.5%, n = 34) compared to the pre-pandemic "winter" period (29.7%, n = 33), with the lowest proportion found in summer (22.5%, n = 43) (p < .01). The same relationship was noted in the proportion of residents who confirmed having taken psychotropic medication in the last year - highest during the spring (40.5%, n = 34), compared to winter (36.7%, n = 40) and summer (18.8%, n = 36; p < .001) | Very small sample size at one incarceration facility – therefore findings may relate to this facility/region alone – caution should be used in extrapolating results. Kessler-6 a screening tool and not diagnostic of significant mental health diagnosis per se. Data taken at booking therefore may be more indicative of community mental health issues rather than in incarcerated people per se. Mental health status may be at its worst at time of booking into jail so results should be interpreted with caution when extrapolating to long term residents. No comparative general population figures therefore unclear if general population effect or specific to incarcerated population. The authors note that they did not control for confounding variables when assessing trends in significant mental illness |
| COVID-19 Case and Mortality Rates in the Federal Bureau of Prisons, Toblin R and Hagan LM , 2021. (26)                                                                                             | U<br>S<br>A | Report, retrospe<br>ctive<br>analysis<br>of data                                 | Inferred aim: to characterise the burden from COVID-19 by calculating the testing, case, and mortality rate in comparison to the general population                                                                               | Prison population compared to the general population, sample size not documented, from 29 February 2020 to 23 September 2020                                                                                                                                                                                                                                     | Data for prison population from federal bureau of prison and COVID specific database, US population data from US census and centres for disease control and prevention (CDC)                                                                                                                                                      | Being in prison during the COVID-19 pandemic | Crude case rate 4.7x higher in prisons than in general population, testing rate was greater in prisons than in the general population, crude mortality rate was not statistically different between prisons and community, SMR for age and sex was 2.6 for prisoners compared to general population                                                                                                                                                                                                                                                              | SMR standardised for age and sex, no other confounders identified, 2 groups were not comparable demographic wise, (38.9% black population in prison compared to 12.3% in general population), US data contained data on children, tests given to prisoners in hospitals were excluded                                                                                                                                                                                                                                                                                                                                                                                                                                                                                                                                           |
| COVID-19 Cases and Deaths in Federal and State Prisons, Saloner et al, 2020 (27)                                                                                                                   | U<br>S<br>A | Report, retrospe<br>ctive<br>analysis<br>of data                                 | Inferred aim: To calculate death and case rate in prisons comparing to general population in US                                                                                                                                   | USA prison population containing data from all states, sample size of 1,295,285 prisoners retrospectively analysed, data collected from 31 February 2020 to 6 June 2020                                                                                                                                                                                          | Data collected from UCLA law COVID-19 behind bars data project, supplemented with news reports and press releases, and department of corrections for age and sex data to adjust the SMR, general population data from US centres for disease control and prevention                                                               | Being in prison during the COVID-19 pandemic | Crude case rate for prisoners 5.5x higher than general population, crude death rate not statistically different, SMR when adjusted for age and sex was 3.0 in prisons compared to the general population, daily COVID-19 case growth rate was 8.3% in prisons compared to 3.4% in USA                                                                                                                                                                                                                                                                            | SMR standardised to age and sex only, not pre-existing conditions, not appraised in full due to being the first half of the study below                                                                                                                                                                                                                                                                                                                                                                                                                                                                                                                                                                                                                                                                                         |
| COVID-19 cases and testing in 53 prison systems, K. Lemasters, E. McCauley, K. Nowotny and L. Brinkley-Rubinstein 2020 (31)                                                                        | U<br>S<br>A | Retrospe<br>ctive<br>analysis<br>of data                                         | Inferred aim: to present testing, infection, and fatality data on incarcerated populations in the early stage of the pandemic                                                                                                     | 53 prison systems (50 states, Puerto Rico, Federal Bureau of prisons and immigration and customs enforcement (ICE), total sample size of all prisoners not                                                                                                                                                                                                       | Publicly accessible data from the COVID Prison Project (CPP) for COVID prison data, each day counts extracted from department of corrections websites, prison population data from vera institute of justice, data from general population of cases and fatalities from John Hopkins Coronavirus Resource Centre, testing numbers | Being in prison during the COVID-19 pandemic | 10 states and Puerto Rico reported no testing information, testing numbers varied across places from 6/1000 to 1531/1000 incarcerated people. Majority of prison systems tested MORE than the general public, test positivity on average higher in prison systems, 34 prison systems have higher case rates per thousand than general population,                                                                                                                                                                                                                | CPP collects data from immigration and customs enforcement, migrants are a sub population and another vulnerable population and may have different outcomes to the prison population, prison population data from vera institute of justice some data collected from pre pandemic (due to being                                                                                                                                                                                                                                                                                                                                                                                                                                                                                                                                 |

|                                                                                                                                                                             |             |                                                 |                                                                                                                                                                                                                                                                                      |                                                                                                                                                                                                                                                                                                                                                          |                                                                                                                                                                                                                                                                                                                                                                                                                      |                                                                                                                                                                               |                                                                                                                                                                                                                                                                                                                                                                                                                                                                                                                                                                                                                                                                                                                                                                                                                                             |                                                                                                                                                                                                                                                                                                                                                                                                                                                                                                                                                                                            |
|-----------------------------------------------------------------------------------------------------------------------------------------------------------------------------|-------------|-------------------------------------------------|--------------------------------------------------------------------------------------------------------------------------------------------------------------------------------------------------------------------------------------------------------------------------------------|----------------------------------------------------------------------------------------------------------------------------------------------------------------------------------------------------------------------------------------------------------------------------------------------------------------------------------------------------------|----------------------------------------------------------------------------------------------------------------------------------------------------------------------------------------------------------------------------------------------------------------------------------------------------------------------------------------------------------------------------------------------------------------------|-------------------------------------------------------------------------------------------------------------------------------------------------------------------------------|---------------------------------------------------------------------------------------------------------------------------------------------------------------------------------------------------------------------------------------------------------------------------------------------------------------------------------------------------------------------------------------------------------------------------------------------------------------------------------------------------------------------------------------------------------------------------------------------------------------------------------------------------------------------------------------------------------------------------------------------------------------------------------------------------------------------------------------------|--------------------------------------------------------------------------------------------------------------------------------------------------------------------------------------------------------------------------------------------------------------------------------------------------------------------------------------------------------------------------------------------------------------------------------------------------------------------------------------------------------------------------------------------------------------------------------------------|
|                                                                                                                                                                             |             |                                                 |                                                                                                                                                                                                                                                                                      | documented, data collected up to 15 July 2020                                                                                                                                                                                                                                                                                                            | from COVID Tracking Project, data presented at state level due to large differences in testing strategies,                                                                                                                                                                                                                                                                                                           |                                                                                                                                                                               | however, most have higher testing rates, 37 states reported no fatalities                                                                                                                                                                                                                                                                                                                                                                                                                                                                                                                                                                                                                                                                                                                                                                   | most recent information available), analysis done at state level, none of the data is standardised, so is probably unreliable and must be interpreted with caution, standardised estimates not done as demographic information and covid-19 deaths at state level is not reported, most recent data from Puerto Rico is from 2012, no confidence intervals reported, no statistical analysis of the data                                                                                                                                                                                   |
| COVID-19 community spread and consequences for prison case rates LeMasters, K. ;Ranapurwala, S. ;Maner, M. ;Nowotny, K. M. ;Peterson, M. ;Brinkley-Rubinstein, L. 2022 (34) | U<br>S<br>A | Retrospe<br>ctive<br>analysis<br>of data        | The study's stated aim was to understand "how the rates of COVID-19 transmission in the communities surrounding prisons affect COVID-19 spread within prisons"                                                                                                                       | The study presented data representing 55,196 individuals, both residents and staff, at facilities within North Carolina, USA between June 01/06/2020 and 31/08/2020. This was compared with general population data from the counties containing each prison.                                                                                            | Data concerning positive test results was captured from de-identified publicly available data from the North Carolina (NC) Department of Health and Human Services. Community population numbers were captured from American Community Survey 2019 data and prison population data from The Vera Institute of Justice and a report from the North Carolina Department of Public Safety on staff at NC state prisons. | Being incarcerated in a facility located in a North Carolina county whose general population had a case rate of at least 50 per 100,000 residents in the preceding seven days | Over the study period a mean active case rate of 427 per 100,000 was noted in the incarcerated population compared with a rate of 215 per 100,000 in the general population. When community rates reached the threshold case rate of at least 50 per 100,000, there was an immediate increase in the COVID-19 case rate in prisons by 118.55 cases per 100,000 (95% CI: -3.71, 240.81). The study authors also noted that there was no significant difference between community COVID-19 rates in counties with and without an incarceration facility.                                                                                                                                                                                                                                                                                      | Large total sample size including general population and incarcerated residents in North Carolina state. Authors note that staff testing information included with resident testing information – they note 35 ordered tests were confirmed as ordered for staff, 29,605 for residents, and 1,045 were unknown. Difference in case rate may be artefactual of differing testing rates between incarcerated populations (who were mandated to perform asymptomatic testing during the study period) and general populations. Results reliant on accuracy of prison reported testing results |
| COVID-19 in Prisons: State Health Care Contracting and the Pandemic Behind Bars Smith, M. ;Glidden, M. D. 2022 (39)                                                         | U<br>S<br>A | Retrospe<br>ctive<br>analysis<br>of data        | The study's stated aim was to assess whether a state average healthcare expenditure per incarcerated person or provision of healthcare services (private contracted staff versus state department of correction staff) had any impact on COVID-19 diagnosis rate and mortality rate. | The study presented a cross-section of data from on 10/07/2020 covering incarceration facilities in 45 US states (Federal Bureau of Prisons, and Alaska, Massachusetts, Mississippi, Tennessee, and West Virginia excluded due to lack of data) – No information is documented with regard to the number of incarcerated individuals covered in the data | Data was collected from publicly available sources: National Survey of Prison Health Care 2021, The Pew Report 2017, National Prisoner Statistics 2018                                                                                                                                                                                                                                                               | Being in prison during the COVID-19 pandemic on 10/07/2020                                                                                                                    | The study noted a lower mean COVID-19 diagnoses per 10,000 (333.20, range 0–1,640) and COVID-19 deaths per 10,000 (3.67, range 0–25 ) in the incarcerated population compared with the general population (COVID-19 diagnoses per 100,000 1,255.32, range, 74.48–20,617.31; COVID-19 deaths per 100,000 66.04 1.34–1,646.11) Incarcerated residents in states who provide at least some healthcare from Department of Correction staff (as opposed to purely privately contracted healthcare) showed significantly better outcomes in the measured variables: COVID-19 deaths per 100,000 were reduced by 3.47 (b = 3.47, p = .04) and COVID-19 diagnosis rate per 10,000 was reduced by 448.70 (b = 448.70, p = .01) Average expenditure on healthcare per incarcerated resident had no significant effect on COVID-19 rates or mortality. | Large sample size over large geographical region. Isolated snapshot of covid rates and mortality on one day. Limited validity of a one day sample -results may change based on period of pandemic chosen eg with availability of new vaccines and therapeutics. No clear explanation of why this particular data chosen for sample. Results reliant upon accuracy of multiple external sources. . Some of data sources measured pre-pandemic therefore not necessarily accurate at time of COVID mortality/rate snapshot – eg. State medical expenditure data from 2017                    |
| COVID-19 in the California State Prison System: an Observational Study of Decarceration, Ongoing, E. T. Chin, T. Ryckman, L. Prince, D. Leidner, F. Alarid-Escudero, J. R.  | U<br>S<br>A | Retrospe<br>ctive<br>observati<br>onal<br>study | To quantify changes to California's prison population since the pandemic began and identify risk factors for COVID-19 infection                                                                                                                                                      | All Californian state prisons were included, analysis of 119,401 prisoners who were in prison between 1 March and 10 October 2020                                                                                                                                                                                                                        | Californian department of corrections and rehabilitation (CDCR) provided data on all prisoners over 18 who resided in prison during study date, data included variables on demographics (sex, age, race), health characteristics, location, participation in prison labour, education and COVID-19 testing history                                                                                                   | Being in prison during the COVID-19 pandemic                                                                                                                                  | 162/96,440 residents were positive, 3.2% hospitalised, 0.3% ICU, 0.5% died, COVID infection rates in dormitory residents (more than 3 in a room) had an adjusted hazard ratio of 2.49 when compared to residents of cells, those with prisoners taking part in out-of-room labour also had higher rates of infection AHR of 1.56, adjusted to include age, sex, ethnicity, pre-existing conditions,                                                                                                                                                                                                                                                                                                                                                                                                                                         | Survival analysis was done, 7 prisons having an outbreak were excluded from analysis due to not having enough time for follow up, 3 were excluded due to an outbreak caused by mass introduction of cases and 1 was exclude due to having testing rates that differed substantially between dormitories                                                                                                                                                                                                                                                                                    |

|                                                                                                                                                                                                                                                                                                                                                                                                  |                        |                                                  |                                                                                                                                                                                                              |                                                                                                                                                                                                                                                                                           |                                                                                                                                                                                                                                                                                                                                                                                                                                                                                                                                                      |                                                           |                                                                                                                                                                                                                                                                                                                                                                                                                                                                                                                                                                                                                                                                                                                     |                                                                                                                                                                                                                                                                                                                                                                                                                                                                                                                                                                                                                          |
|--------------------------------------------------------------------------------------------------------------------------------------------------------------------------------------------------------------------------------------------------------------------------------------------------------------------------------------------------------------------------------------------------|------------------------|--------------------------------------------------|--------------------------------------------------------------------------------------------------------------------------------------------------------------------------------------------------------------|-------------------------------------------------------------------------------------------------------------------------------------------------------------------------------------------------------------------------------------------------------------------------------------------|------------------------------------------------------------------------------------------------------------------------------------------------------------------------------------------------------------------------------------------------------------------------------------------------------------------------------------------------------------------------------------------------------------------------------------------------------------------------------------------------------------------------------------------------------|-----------------------------------------------------------|---------------------------------------------------------------------------------------------------------------------------------------------------------------------------------------------------------------------------------------------------------------------------------------------------------------------------------------------------------------------------------------------------------------------------------------------------------------------------------------------------------------------------------------------------------------------------------------------------------------------------------------------------------------------------------------------------------------------|--------------------------------------------------------------------------------------------------------------------------------------------------------------------------------------------------------------------------------------------------------------------------------------------------------------------------------------------------------------------------------------------------------------------------------------------------------------------------------------------------------------------------------------------------------------------------------------------------------------------------|
| Andrews, et al. Risks, and Risk Factors 2021 (49)                                                                                                                                                                                                                                                                                                                                                |                        |                                                  |                                                                                                                                                                                                              |                                                                                                                                                                                                                                                                                           |                                                                                                                                                                                                                                                                                                                                                                                                                                                                                                                                                      |                                                           | reduction of prison capacity by 19.1% during study period                                                                                                                                                                                                                                                                                                                                                                                                                                                                                                                                                                                                                                                           | and cells, no comparisons to the general population                                                                                                                                                                                                                                                                                                                                                                                                                                                                                                                                                                      |
| COVID-19 in the New York City Jail System: Epidemiology and Health Care Response, March-April 2020, J. Chan, K. Burke, R. Bedard, J. Grigg, J. Winters, C. Vessell, et al. 2021 (56)                                                                                                                                                                                                             | U<br>S<br>A            | Retrospective observational cohort study         | Inferred aim: to describe the COVID-19 pandemic in NYC jails from mid-March to April, including demographic characteristics and signs/symptoms of people tested for COVID-19, with risk factors for COVID-19 | Study of patients aged 18 and over in New York City jails/hospital units with people from jail who were tested for COVID-19, out of 978 had been tested for COVID 19, with 568 positive results, from 11 March to 28 April 2020                                                           | Demographic, clinical, lab and hospitalisation data from electronic medical records, does not state where data from the general population is from                                                                                                                                                                                                                                                                                                                                                                                                   | Being in prison during the COVID-19 pandemic              | 978 nasopharyngeal swabs done, 568 positive (58%), of 257 who were asymptomatic, 58 (23%) were positive. Median age was 36 in symptomatic testing and 46 in asymptomatic testing cohort, of the people who received positive tests 45 people (8%) were hospitalised, of which 7% of these were asymptomatic at diagnosis. Of the 45 people hospitalised 8% were admitted to ICU and 7% died in custody, older age (over 35 compared to 18-34), high BMI, smoking, DM, HTN, CVD, pulmonary disease (excluding asthma) in univariate analysis were significant risks, in multivariable analysis, just older age was significant (very wide CI),                                                                       | Testing cohort significantly older than overall jail population, small sample of people hospitalised n=45, therefore very wide CI and many RF were not proven to increase the risk of hospitalisation when doing multivariable regression, Data on COVID-19 outcomes censored for people released from jail before study ended, may underestimate true risk of certain FR eg age and DM as lots of these people were decarcerated from prison, symptom driven testing - most patients who were hospitalised were diagnosed very close to when they were hospitalised, therefore missing the early progression of disease |
| COVID-19 Incidence and Mortality in Federal and State Prisons Compared with the US population, April 5, 2020 to April 3, 2021, Marquez et al, 2021 (28)                                                                                                                                                                                                                                          | U<br>S<br>A            | Report, retrospective analysis of data           | Inferred aim: to assess the first 52 weeks of the pandemic, comparing cases and deaths in prisons and the general population, to calculate adjusted SMR for prisoners versus general population              | Prisoners from the USA across 50 states, sample size not mentioned and was an estimation, data collected from 5 April 2020 to 3 April 2020                                                                                                                                                | Data collected from UCLA law COVID-19 behind bars project, Marshall Project and Associated Press, prison population data from Vera institute, general population data from Census and CDC and prevention                                                                                                                                                                                                                                                                                                                                             | Being in prison during the COVID-19 pandemic              | crude case rate 3.3x higher in prisons than in the general population, SMR was 2.5 for the prison population compared to the general population                                                                                                                                                                                                                                                                                                                                                                                                                                                                                                                                                                     | SMR standardised to age and sex, no other confounders noted, no details about how the SMR was calculated, limited to publicly available data,                                                                                                                                                                                                                                                                                                                                                                                                                                                                            |
| COVID-19 Infection Among Incarcerated Individuals and Prison Staff in Lombardy, Italy, March 2020 to February 2021 Mazzilli, S. ;Tavoschi, L. ;Soria, A. ;Fornili, M. ;Cocca, G. ;Sebastiani, T. ;Scardina, G. ;Cairone, C. ;Arzilli, G. ;Lapadula, G. ;Ceccarelli, L. ;Cocco, N. ;Bartolotti, R. ;De Vecchi, S. ;Placidi, G. ;Rezzonico, L. ;Baglietto, L. ;Giuliani, R. ;Ranieri, R. 2022 (35) | It<br>a<br>l<br>y      | Repeated cross-sectional study                   | The stated aim was to report the extent/dynamics of the COVID-19 pandemic within the Lombardy prison system                                                                                                  | The study presented data representing a mean of 7599 incarcerated residents in 18 facilities within the Lombardy region of Italy taken from 01/03/2020 to 28/02/2021. The study assigned two discrete periods – first wave (March-June 2020) and second wave (October 2020-February 2021) | COVID-19 related data was collated from daily reports provided by individual prisons as a regional mandated requirement to Prison Superintendence of the Lombardy region. Prison population data was estimated as the number of residents in each facility on the last day of the month.<br><br>General population data was collated from publicly available sources: Italy National Institute of Statistics and GitHub repositories developed by the Italian Presidency of the Council of Ministers and the Italian Department of Civil Protection. | Being in prison during the COVID-19 pandemic              | The study demonstrated a higher relative risk of COVID-19 infection in incarcerated residents than the general population (first wave: RR 1.30; 95% CI, 1.06-1.58 second wave RR3.91; 95% CI, 3.73-4.09), higher mean weekly testing rate per 1000 individuals versus the general population(first wave: 61.09 range, 0-115.44 versus 6.11 range, 1.16-10.41 second wave: 258.43 range, 123.92-573.08 versus 19.73 range, 11.68-30.09).. A lower average weekly positivity rate per 100 individuals was noted in incarcerated individuals versus the general population however (first wave: 1.76 range, 0.00-10.68 versus 9.55 range, 1.21-37.50 second wave: 4.46 range, 0.00-17.92 versus 8.71 range, 1.16-20.71 | Small sample size in small geographical area. Authors note unable to calculate numbers of patients admitted/moved/released from prison therefore population numbers are an estimation.. Different testing regimes enforced in incarceration facilities compared to general population likely contributed to under testing in community and underestimation of general population prevalence, therefore relative risk of covid positivity should be interpreted with caution. Results rely upon accuracy of prison data reports                                                                                           |
| COVID-19 Outbreak in a Large Penitentiary Complex, April-June 2020, Brazil Gouvea-Reis, F. A. ;Oliveira, P. D. ;Silva, D. C. S. ;Borja, L. S. ;Percio, J. ;Souza, F. S. ;Peterka, C. ;Feres, C. ;de Oliveira, J. ;Sodré,                                                                                                                                                                         | B<br>r<br>a<br>z<br>il | Outbreak Report – retrospective analysis of data | The study's stated aim is to describe an outbreak of COVID-19 at a single prison complex and estimate disease transmissibility                                                                               | The study presented data from a single prison complex in the Brasilia region of Brazil, between 01/04/2020 and 12/06/2020 representing in excess of 13,000 incarcerated males                                                                                                             | Data were collected from secondary sources: prison reported COVID-19 information, prison records and monitoring resources of the healthcare system                                                                                                                                                                                                                                                                                                                                                                                                   | Being in case study's prison during the COVID-19 pandemic | The study notes a higher COVID-19 incidence rate in the case study prison population versus the general population of the Brasilia region (1,832 cases/100,000 persons versus 47 cases/100,000). The study demonstrated a mean serial case interval at 2.51 days (SD 1.21) - this was noted to be shorter than the figure for the general population of Brazil, however the figures for comparison are not documented.                                                                                                                                                                                                                                                                                              | Very small sample size in single prison complex. Data specific to single prison, thus not generalisable to other facilities/countries. Results rely upon the accuracy if prison reported data. No documentation of testing policies or rates within the prison – elevated incidence rate may be artefactual of testing rates. Male only prison therefore results not necessarily generalisable                                                                                                                                                                                                                           |



|                                                                                                                                                                              |                   |                                                           |                                                                                                                                                                                                                                                                                                                                                          |                                                                                                                                                                                                                                                                                                               |                                                                                                                                                                                                                   |                                                                                                     |                                                                                                                                                                                                                                                                                                                                                                                                                                                                                                                                                                                                                                                                                                                                                                                                                                                                                                                                                                                                                                                                                                                                                                         |                                                                                                                                                                                                                                                                                                                                                                                                                                                                                                                                                                                                                                                                                                                    |
|------------------------------------------------------------------------------------------------------------------------------------------------------------------------------|-------------------|-----------------------------------------------------------|----------------------------------------------------------------------------------------------------------------------------------------------------------------------------------------------------------------------------------------------------------------------------------------------------------------------------------------------------------|---------------------------------------------------------------------------------------------------------------------------------------------------------------------------------------------------------------------------------------------------------------------------------------------------------------|-------------------------------------------------------------------------------------------------------------------------------------------------------------------------------------------------------------------|-----------------------------------------------------------------------------------------------------|-------------------------------------------------------------------------------------------------------------------------------------------------------------------------------------------------------------------------------------------------------------------------------------------------------------------------------------------------------------------------------------------------------------------------------------------------------------------------------------------------------------------------------------------------------------------------------------------------------------------------------------------------------------------------------------------------------------------------------------------------------------------------------------------------------------------------------------------------------------------------------------------------------------------------------------------------------------------------------------------------------------------------------------------------------------------------------------------------------------------------------------------------------------------------|--------------------------------------------------------------------------------------------------------------------------------------------------------------------------------------------------------------------------------------------------------------------------------------------------------------------------------------------------------------------------------------------------------------------------------------------------------------------------------------------------------------------------------------------------------------------------------------------------------------------------------------------------------------------------------------------------------------------|
| G. ;Dos Santos, W. ;de Moraes, C 2021 (33)                                                                                                                                   |                   |                                                           |                                                                                                                                                                                                                                                                                                                                                          |                                                                                                                                                                                                                                                                                                               |                                                                                                                                                                                                                   |                                                                                                     |                                                                                                                                                                                                                                                                                                                                                                                                                                                                                                                                                                                                                                                                                                                                                                                                                                                                                                                                                                                                                                                                                                                                                                         |                                                                                                                                                                                                                                                                                                                                                                                                                                                                                                                                                                                                                                                                                                                    |
| COVID-19 vaccination in the Federal Bureau of Prisons, December 2020–April 2021 Hagan, L. M. ;Dusseau, C. ;Crockett, M. ;Rodriguez, T. ;Long, M. J. 2021 (65)                | U<br>S<br>A       | Retrospe<br>ctive<br>analysis<br>of data                  | The stated aim of the study was "to describe COVID-19 vaccine distribution operations in United States Federal Bureau of Prisons institutions and offices from December 16, 2020–April 14, 2021, report vaccination coverage among staff and incarcerated people, and identify factors associated with vaccination acceptance among incarcerated people" | The study presented data from 122 Federal Bureau of Prisons managed institutions, 8 administrative offices and 2 staff training centres across 36 states, Washington, DC, and Puerto Rico representing 126,413 incarcerated residents and 37,870 members of staff taken from December 16/12/2020 - 14/04/2021 | Data were collated for incarcerated residents and staff from Federal Bureau of Presentations records. Data concerning the general population vaccine rates were collected from the CDC COVID Data Tracker website | Being resident or staff member in a Federal Bureau of Prisons facility during the COVID-19 pandemic | A median of 33.4% (range 12.6–59.3% ) of incarcerated residents and staff had received a full course of vaccinations by the end of the study versus a median of 29.5% (range 20.3-37.8%) of the general adult population. COVID-19 vaccination was offered to 100% of staff and 69.8% of incarcerated residents over the study period. Acceptance rates were 50.2% for staff and 64.2% for residents.. Factors increasing odds of vaccine acceptance include: Increasing age compared with the <40 years age group (≥75 years aOR = 2.71, 95% CI = 2.09, 3.52), higher number of medical conditions associated with severe COVID-19 illness (6 conditions aOR = 2.99, 95% CI = 2.46, 3.63) , having a prior SARS-CoV-2 infection (aOR = 1.08, 95% CI = 1.05, 1.12), place of birth outside of the United States (aOR = 1.42, 95% CI = 1.34, 1.51), unknown country of birth (aOR = 1.42, 95% CI = 1.14, 1.77) Factors decreasing odds of vaccine acceptance include: female sex versus male (aOR = 0.60, 95% CI = 0.53, 0.67) non-Hispanic Black race (aOR = 0.43, 95% CI = 0.41, 0.44) or Asian race (aOR = 0.79, 95% CI = 0.68, 0.91) versus non-Hispanic white race. | Large sample over multiple institutions in large geographical area. Detailed demographic data for population documented. Results depend upon accuracy of publicly reported CDC data. Bureau of Prisons data could not be separated from CDC general population data. Staff vaccination data is likely to be underestimated given vaccinations in the community were not captured in the Federal Department of Prison's dataset.                                                                                                                                                                                                                                                                                    |
| COVID-19 Vaccination Uptake and Related Determinants in Detained Subjects in Italy Di Giuseppe, G. ;Pelullo, C. P. ;Lanzano, R. ;Lombardi, C. ;Nese, G. ;Pavia, M. 2022 (71) | It<br>a<br>l<br>y | Cross-<br>sectional<br>study via self-<br>reported survey | The stated aim of the study was to "to explore the extent of COVID-19 vaccination coverage and to investigate drivers and barriers to COVID-19 vaccine uptake among people in prison in Italy"                                                                                                                                                           | The study presented data collected from 3 incarceration facilities in the Campagna region of Italy, representing 517 incarcerated residents between July 2021 and October 2021 as part of a larger project investigating health outcomes in the incarcerated population.                                      | Data were collected using a self-reported survey given to incarcerated residents to complete. It collected data regarding demographics, vaccine uptake and attitudes and behaviours surrounding vaccination.      | Being resident in prison during the COVID-19 pandemic                                               | An overall response rate of 79.5% was noted. 89.7% respondents reported vaccine uptake.. Comparative vaccination uptake in incarcerated populations from other countries ranged from 36.7% (Moldova) to 90% (Poland). Factors affecting COVID-19 vaccination uptake included: Female sex (OR = 15.94; 95% CI = 1.67–152.7), influenza vaccination uptake in the 2020–2021 season (OR = 6.21; 95% CI = 1.88–20.52), vaccine information sourced from media and newspapers (OR = 4.37; 95% CI= 1.6–11.9), declining additional information about COVID-19 vaccine (OR = 0.29; 95% CI = 0.1–0.81), belief that COVID-19 vaccine is safe (OR = 1.23; 95% CI = 1.03–1.47), involvement in working activities in the prison (OR = 3.1; 95% CI = 1.03–9.36), higher level of education - primary school education versus secondary school/university education (OR = 0.31; 95% CI = 0.1–0.93)                                                                                                                                                                                                                                                                                  | Small sample size in small geographic location. Survey used to collect data – prone to bias as subjects may record responses felt to be desirable rather than truth, particularly regarding vaccine uptake. High response rate increases validity of findings and sample size calculation response level met. Voluntary survey – responders may show differing behaviours to non-responders. Unclear what proportion of entire 3 facilities population represented by sample size. Unclear if vaccine reporting constitutes full course or single dose. Comparative country incarcerated resident vaccination rates not necessarily compatible due to heterogenous reporting mechanisms and vaccination strategies |



|                                                                                                                                                                                                                                                       |             |                                                               |                                                                                                                                                                                                                                                                                                                                                                                       |                                                                                                                                                                                                                                   |                                                                                                                                                                                                                                                                                                                                                        |                                                                                                                                               |                                                                                                                                                                                                                                                                                                                                                                                                                                                                                                                                                                                  |                                                                                                                                                                                                                                                                                                                                                                                  |
|-------------------------------------------------------------------------------------------------------------------------------------------------------------------------------------------------------------------------------------------------------|-------------|---------------------------------------------------------------|---------------------------------------------------------------------------------------------------------------------------------------------------------------------------------------------------------------------------------------------------------------------------------------------------------------------------------------------------------------------------------------|-----------------------------------------------------------------------------------------------------------------------------------------------------------------------------------------------------------------------------------|--------------------------------------------------------------------------------------------------------------------------------------------------------------------------------------------------------------------------------------------------------------------------------------------------------------------------------------------------------|-----------------------------------------------------------------------------------------------------------------------------------------------|----------------------------------------------------------------------------------------------------------------------------------------------------------------------------------------------------------------------------------------------------------------------------------------------------------------------------------------------------------------------------------------------------------------------------------------------------------------------------------------------------------------------------------------------------------------------------------|----------------------------------------------------------------------------------------------------------------------------------------------------------------------------------------------------------------------------------------------------------------------------------------------------------------------------------------------------------------------------------|
| Covid-19 Vaccine Acceptance Among People Incarcerated in Connecticut State Jails Margaret, Lind ;Byron, S. Kennedy ;Murilo Dorion, Nieto ;Amy, J. Houde ;Peri, Sosensky ;Ryan, Borg ;Derek, A. T. Cummings ;Albert, Ko ;Robert, P. Richeson 2023 (66) | U<br>S<br>A | Retrospe<br>ctive<br>cohort<br>study                          | The stated aim was to evaluate the success of Connecticut department of Correction's vaccination programme within jails by comparing vaccination rates among newly incarcerated people before and after incarceration                                                                                                                                                                 | The study presented data collated from 5 jail facilities in Connecticut state, USA representing a total of 6,522 people who stayed ≥1 night in a jail facility whilst vaccine eligible between February 02/02/2021 and 08/11/2021 | Data were collated from the Connecticut Department of Corrections database                                                                                                                                                                                                                                                                             | Spending ≥1 night in a Connecticut department of Corrections jail facility whilst vaccine eligible between February 02/02/2021 and 08/11/2021 | Of 3,716 residents who were eligible for vaccination at intake 2,265 (61.0%) had a recorded offer and 476 (12.8%) consented to and received vaccination whilst in jail. Incarcerated residents spent more time eligible for vaccination in the community (79 days, IQR: 41-183) than in jail (14 days IQR: 3-31) and were 12.5 (95% CI = 10.2-15.3) times more likely consent to and receive vaccination while incarcerated than prior to incarceration.                                                                                                                         | Small sample size in small geographical location. Results reliant on accuracy of Connecticut Department of Corrections dataset. Authors note that their jail vaccine acceptance rates were based upon recorded offers and not all offers would be recorded. The authors note that the selection of residents and at-risk time for the survival analysis may have introduced bias |
| COVID-19 Vaccine Acceptance in California State Prison, E. T. Chin, D. Leidner, T. Ryckman, Y. E. Liu, L. Prince, F. Alarid-Escudero, et al. 2021 (69)                                                                                                | U<br>S<br>A | Retrospe<br>ctively<br>analysis<br>of data<br>(pre-<br>print) | To calculate the percentage of residents who accepted at least one dose among the residents who were offered doses and to use multivariable logistic regression analysis to estimate the probability of the acceptance of at least one dose according to race, age, medical vulnerability, and history of COVID 19. Acceptance after initial decline of vaccination was also assessed | Two thirds of the 97,779 incarcerated residents in California were offered a vaccine, from 22 December 2020 to 4 March 2021                                                                                                       | Californian department of corrections and rehabilitation (CDCR) provided anonymised data for all Californian prison residence.                                                                                                                                                                                                                         | Being offered a COVID-19 vaccine whilst in prison                                                                                             | 66.5% of those offered accepted at least one dose, adjusted analysis shows that uptake was highest in Hispanic and White residence and lowest amongst Black residents, adjusted for room type, participation in penal labour, security level and prison, also adjusted for age/co-morbidities using COVID-19 risk score, younger and healthy residents (based on COVID-19 risk score - identifies 17 risk factors and scores them accordingly) were less likely to accept vaccines (statistically significant), lots of residents who had re-offered a vaccine then was accepted | Stated that prisoners were re-offered vaccines and many accepted, however no documentation on statistics of this. Interaction terms for COVID risk score and race, and age and race were included                                                                                                                                                                                |
| COVID-19 vaccine prioritization of incarcerated people relative to other vulnerable groups: An analysis of state plans, R. Strodel, L. Dayton, H. M. Garrison-Desany, G. Eber, C. Beyrer, J. Arscott, et al. 2021 (72)                                | U<br>S<br>A | Analysis<br>of<br>policies                                    | Inferred aim: to understand the inclusion of prisoners in vaccination plans and to describe if the most recent publicly available state COVID-19 vaccine distribution plans explicitly include incarcerated individuals, and if so, how are they prioritised relative to other populations                                                                                            | Analysis included all 50 states and the district of Columbia, analysis of plans up to 31 December 2020                                                                                                                            | Publicly available data from the COVID 19 vaccination program interim playbook for jurisdiction operations (CDC playbook), analysis of plans and revisions up to December 31 2020, CDC implemented a 3 stage plan for vaccine prioritisation, supplemental information in vaccine prioritization available from state health departments also analysed | Being in prison in COVID 19 times                                                                                                             | 92% of plans mentioned correctional facilities as critical populations, 47% did not mention which phase prisoners were planned for, 22% in phase 1, 29% in phase 2, 2% in phase 3, prison workers (49%) and law enforcement officers (63%) more likely included in phase 1, variation per state, all plans included residents of care homes in phase 1, over 65s were prioritised in phase 1 for 59% of plans, does not state what happens if someone is over 65 and in prison                                                                                                   | Used triple coding strategy to ensure appropriate data analysis, plans only up to dec 2020 were included, meaning different groups may have been prioritised by the time the vaccine roll out happened, not all covid-19 plans were publicly available, not very relevant to WCEC                                                                                                |

|                                                                                                                                                                                                                                                                                                                                             |                                      |                                                              |                                                                                                                                                                                        |                                                                                                                                                                                                                |                                                                                                                                                                                                                                                                                                                                                                                                                                                                                                                                                                                                                                  |                                                       |                                                                                                                                                                                                                                                                                                                                                                                                                                                                                                                                                                                                                                                                                         |                                                                                                                                                                                                                                                                                                                                                                                                                                                                                                                                                                                                                                                                                                                                                                                                                                                             |
|---------------------------------------------------------------------------------------------------------------------------------------------------------------------------------------------------------------------------------------------------------------------------------------------------------------------------------------------|--------------------------------------|--------------------------------------------------------------|----------------------------------------------------------------------------------------------------------------------------------------------------------------------------------------|----------------------------------------------------------------------------------------------------------------------------------------------------------------------------------------------------------------|----------------------------------------------------------------------------------------------------------------------------------------------------------------------------------------------------------------------------------------------------------------------------------------------------------------------------------------------------------------------------------------------------------------------------------------------------------------------------------------------------------------------------------------------------------------------------------------------------------------------------------|-------------------------------------------------------|-----------------------------------------------------------------------------------------------------------------------------------------------------------------------------------------------------------------------------------------------------------------------------------------------------------------------------------------------------------------------------------------------------------------------------------------------------------------------------------------------------------------------------------------------------------------------------------------------------------------------------------------------------------------------------------------|-------------------------------------------------------------------------------------------------------------------------------------------------------------------------------------------------------------------------------------------------------------------------------------------------------------------------------------------------------------------------------------------------------------------------------------------------------------------------------------------------------------------------------------------------------------------------------------------------------------------------------------------------------------------------------------------------------------------------------------------------------------------------------------------------------------------------------------------------------------|
| Depressive, Anxiety Symptom Frequency and Related Factors Among Prisoners During the COVID-19 Pandemic in Northeastern Ethiopia, a Cross-Sectional Study Birkie, M. ;Necho, M. ;Tsehay, M. ;Gelaye, H. ;Beyene, A. ;Belete, A. ;Asmamaw, A. ;Tessema, Z. T. ;Bogale, K. ;Adane, M. 2022 (75)                                                | E<br>t<br>h<br>i<br>o<br>p<br>i<br>a | Cross sectional study                                        | The stated aim was “to assess depression, anxiety, and associated factors among Dessie City prisoners during the 2020 COVID-19 outbreak”                                               | The study presented data from an incarceration facility in Dessie, Amhara State, Ethiopia collected during October 2020 representing 1,550 total incarcerated residents of whom 420 were included in the study | Data were collected from a survey, performed by qualified mental health nurses, comprising multiple mental health instruments including PHQ-9, GAD-7 and Insomnia Severity Score                                                                                                                                                                                                                                                                                                                                                                                                                                                 | Being resident in prison during the COVID-19 pandemic | 279 (66.4%; 95% CI 61.4, 70.6) of incarcerated residents met the threshold score for major depressive disorder (PHQ-9 score ≥10). 281 (66.9%; 95% CI 61.9, 71.9) met the threshold for generalized anxiety disorder (GADs-7 score >10). . This contrasts with pre-pandemic studies in the Ethiopian incarcerated population quoted by the authors where depression prevalence rates ranged from 41.9%-56.4 and anxiety prevalence rate was 36.1%.                                                                                                                                                                                                                                       | Small sample size in small geographical area. Validated mental health instruments used although translation of these tools may lead to errors and reduce validity. High response rate (99.2%) increases validity of findings. . Study sample size calculation assumes a 50% prevalence of conditions – unclear why this value chosen. Selection of cross sampling may introduce bias. Little details given of comparative pre-pandemic mental health outcome studied therefore comparison should be interpreted with caution. No concurrent general population data documented so unclear if this is a population effect rather than specific to incarcerated population                                                                                                                                                                                    |
| Disparities in COVID-19 Related Mortality in U.S. Prisons and the General Population, Nowotny K M et al, 2020 (58)                                                                                                                                                                                                                          | U<br>S<br>A                          | Retrospective analysis of data                               | Inferred aim: to provide an analysis of COVID-19 mortality data to assess the potential magnitude of COVID-19 amongst prison residents and to contextualise COVID-19 deaths in prisons | 32/50 state departments included who had reported at least one COVID-19 death, total sample size not documented, dates of study from 22 April 2020 to 15 July 2020                                             | Primary data from the COVID Prison Project (CPP) which tracks 53 prison systems, prison systems reporting at least 1 death were included, data also collected from a variety of sources e.g. CDC, bureaus of justice statistics but does not state what kind of data                                                                                                                                                                                                                                                                                                                                                             | Being in prison during the COVID-19 pandemic          | By July 15 there had been 683 covid deaths, averaging 48 a week by July 11, Standardised (for age and sex) mortality rate was 2.75 in comparison to the public, crude mortality rate of 50/10,000 in prisons compared to 40/10,000 in general public, SMR varied hugely between states, with some states going up to 10.56 that of the general population                                                                                                                                                                                                                                                                                                                               | 14 states were excluded from analysis, not clear whether this is because they had no deaths or they reported no deaths, additional national data also collected from other sources, does not state which kind of data this is, and they use the 'latest year that has data publicly available' presumably then not including COVID data?, no confidence intervals for SMR, does not give denominators or how this is calculated, a previous critical appraisal of this recommends that the paper has 'major revise', those prisons who had not had any deaths were not included in analysis therefore skewing the SMR and the results to higher than they might be                                                                                                                                                                                          |
| Epidemiology of Coronavirus Disease 2019 at a County Jail—Alameda County, California, March 2020–March 2021 Marusinec, Rachel ;Brodie, Daniel ;Buhain, Sonal ;Chawla, Colleen ;Corpuz, John ;Diaz, Jennifer ;Durbin, Michael ;Moss, Nicholas ;Okada, Reiko ;Sanchez, Yesenia ;Watkins-Tartt, Kimi ;Yette, Emily ;Chitnis, Amit S. 2022 (36) | U<br>S<br>A                          | Outbreak investigation, analysis of real-time infection data | The study aimed to describe epidemiology of a COVID-19 outbreak at a jail in Alameda County from 01/03/2020-31/03/2021                                                                 | The study presented data collection from a jail in Alameda County, California, USA from March 2020 to March 2021, with a population over this time period ranging from 1751-2625 incarcerated people.          | The data was collected by a private clinical firm, Wellpath, who kept a daily line-list of all cases among incarcerated persons and all tests conducted at the jail in question. This data was then verified by Alameda County Health Care Services Agency Public Health Department staff who verified all information regarding positive COVID-19 tests by viewing laboratory reports in the California Reportable Disease Information Exchange.. Community rates were calculated by dividing the number of cases in Alameda county's local health jurisdiction each week by the county estimated 2020 population of 1 529 812. | Being in jail during the COVID-19 pandemic            | The study reported that COVID-19 incidence rate within the jail over the study period was 280 cases per 1000 population. This was 5.29 times that of the local general population (95% confidence interval, 4.87-5.75) 9/571 were hospitalised with no deaths, peaks in the prison were linked to peaks in the community. Total of 10 494 tests taken in prison, 18 mass testing events happened, 60% of those tested were asymptomatic at the time of testing, those younger, Hispanic or Latino (44%) and black (32%) had a higher percentage of positive tests (however no statistical analysis was performed) in the community 40% of positive tests were Latino and 8% were black, | Very small sample size in very small geographical location. Community rates were not adjusted for age or co-morbidity therefore data needs to be interpreted with caution. Testing strategies within the jail varied over time, so data may be unreliable with regard to case rates earlier in pandemic period. Definition of jail associated cases may have included some community acquired cases, therefore data to be interpreted with caution. Data from jail facility not necessarily generalisable to other incarceration facilities (eg prison) due to the rapid turnover and transient nature of stays in jail facilities. No information about community testing rates so unclear if higher incidence an artefact of testing rates. Limited demographic information given so comparisons between differing population should be made with caution |
| Epidemiology of COVID-19 Among Incarcerated Individuals and Staff in Massachusetts Jails and                                                                                                                                                                                                                                                | U<br>S<br>A                          | Retrospective                                                | Inferred aim: to describe the covid 19 burden in Massachusetts jails and prisons and its                                                                                               | Looked at the prison population in Massachusetts, at baseline 14 987 people were                                                                                                                               | Data collected from 16 Massachusetts department of corrections (MA DOC) and 13 county level systems, used publicly available anonymised data, data from general population                                                                                                                                                                                                                                                                                                                                                                                                                                                       | Being in prison during the                            | Incidence of covid was 44.3/1000 for prisoners, 2.91 times higher than Massachusetts general pop and 4.8 times greater than general population, systems with higher testing rates had higher case                                                                                                                                                                                                                                                                                                                                                                                                                                                                                       | Prevalence rates and risk ratio not standardised, no documentation of confounders or demographics of the population, does not document the testing                                                                                                                                                                                                                                                                                                                                                                                                                                                                                                                                                                                                                                                                                                          |

|                                                                                                                                                                                                                                      |             |                                |                                                                                                                                                                                                                                                 |                                                                                                                                                                                                                                                                            |                                                                                                                                                                                                                                                                                                                                                 |                                              |                                                                                                                                                                                                                                                                                                                                                                                                                                                                                                                                                                                                                                                                                                   |                                                                                                                                                                                                                                                                                                                                                                                                                                                                                                                                                                                                                                                                                                                                                                                                                                                                                       |
|--------------------------------------------------------------------------------------------------------------------------------------------------------------------------------------------------------------------------------------|-------------|--------------------------------|-------------------------------------------------------------------------------------------------------------------------------------------------------------------------------------------------------------------------------------------------|----------------------------------------------------------------------------------------------------------------------------------------------------------------------------------------------------------------------------------------------------------------------------|-------------------------------------------------------------------------------------------------------------------------------------------------------------------------------------------------------------------------------------------------------------------------------------------------------------------------------------------------|----------------------------------------------|---------------------------------------------------------------------------------------------------------------------------------------------------------------------------------------------------------------------------------------------------------------------------------------------------------------------------------------------------------------------------------------------------------------------------------------------------------------------------------------------------------------------------------------------------------------------------------------------------------------------------------------------------------------------------------------------------|---------------------------------------------------------------------------------------------------------------------------------------------------------------------------------------------------------------------------------------------------------------------------------------------------------------------------------------------------------------------------------------------------------------------------------------------------------------------------------------------------------------------------------------------------------------------------------------------------------------------------------------------------------------------------------------------------------------------------------------------------------------------------------------------------------------------------------------------------------------------------------------|
| Prisons, M. C. Jimenez, T. L. Cowger, L. E. Simon, M. Behn, N. Cassarino and M. T. Bassett, 2020 (30)                                                                                                                                |             | cohort study                   | association with de-carceration and testing rates                                                                                                                                                                                               | incarcerated, as of July 8, 664 incarcerated individuals had tested positive for covid, data collected from 5 April to 8 July 2020                                                                                                                                         | from the COVID tracking project and Massachusetts government? Does not specifically state                                                                                                                                                                                                                                                       | COVID-19 pandemic                            | rates, case incidents were higher among systems that released a lower proportion of their baseline population                                                                                                                                                                                                                                                                                                                                                                                                                                                                                                                                                                                     | rates alongside it and higher testing rates accounts for higher case rates, does not state why people were tested eg asymptomatic mass testing or symptomatic testing, does not say which kind of tests were used                                                                                                                                                                                                                                                                                                                                                                                                                                                                                                                                                                                                                                                                     |
| Epidemiology of COVID-19 in Prisons, England, 2020, W. M. Rice, D. Y. Chudasama, J. Lewis, F. Senyah, I. Florence, S. Thelwall, et al. (38)                                                                                          | U<br>K      | Epidemiological report         | Inferred aim: to describe characteristics and outcomes for prison-associated covid-19 cases in England reported to Public Health England                                                                                                        | 734 incarcerated prisoners had tested positive and 412 prison staff, data collected from 16 March 2020 to 12 October 2020                                                                                                                                                  | Using data from PHE reporting system about PCR results, prison residences were identified from the addresses via Locator Hub software and matched against a national database of properties, fuzzy matching was used on failed records and manually matched remaining records, used lab records for key worker testing to identify prison staff | Being in prison during the COVID-19 pandemic | Crude incidence in prisoners in England was 988/100,000, compared to 935/100,000 in general population, therefore not statistically different, higher percentage of positive tests for Black (6.4% vs 3.3%) and Asian (7.8% vs 7.5%) compared to the general population is done however no statistical analysis of this was done, case fatality ratio of 3.13% (CI 2-4.67) in prisons compared to in 8% in England over study time, CFR for over 66 in prison was 15.5% but no comparison to the general public over, not standardised                                                                                                                                                            | Does not state how the crude case incidence was calculated, does not say where prison or general population data is gained from, not standardised looked at confounders, the matching of the cases used fuzzy matching or manual matching, means there is a chance of human error when matching or that address data may not be accurate, data collection seems unreliable and not explained coherently,                                                                                                                                                                                                                                                                                                                                                                                                                                                                              |
| Examining COVID-19 Mortality Rates by Race and Ethnicity Among Incarcerated People in U.S. State Prisons Mimi Yen, Li ;Shelby, Grebbin ;Ankita, Patil ;Tori, Cowger ;Dennis, Kunichoff ;Justin, M. Feldman ;Monik, Jimenez 2022 (64) | U<br>S<br>A | Retrospective analysis of data | The study aimed to estimate COVID-19 mortality rates among individuals incarcerated in U.S. state prisons by race and ethnicity                                                                                                                 | The study presented publicly available data from 11 US states between 01/03/2020 and 01/10/2020 representing a sample of 309,273 incarcerated individuals. The data analysed 23.35% (272 of 1165) of all COVID-19 related deaths in US prisons over the study time period. | Data was primarily collected from COVID19 data from state-level Departments of Corrections reports. Supplemental data was included from other sources, of which Department of Corrections COVID-19 dashboards and Texas Justice Initiative were specifically named.                                                                             | Being in prison during the COVID-19 pandemic | The study reported that the age-adjusted rate of COVID-19 mortality was significantly higher among Black compared to White incarcerated individuals (RR = 1.93, 95% CI: 1.25–2.99), among Hispanic compared to White incarcerated individuals (RR = 1.81, 95% CI: 1.10–2.96) and among “other” non-white groups. (RR = 2.60, 95% CI: 1.01–6.67) The study also noted that the average age at COVID-19 mortality was 63 years (SD = 10 years) – this was demonstrated to be significantly lower among Black (60 years, SD = 11 years) versus White adults (66 years, SD = 10 years; p < 0.001) but not in Hispanic (65 years, SD = 9 years) or “Other” non-white groups (66 years, SD = 8).        | Large sample capturing nearly a quarter of all reported COVID-19 related deaths in USA prison systems over study period. Not all states were included in data for following reasons: reported Hispanic ethnicity without racial classification, requested fees ≥\$500, did not provide sufficient data to calculate age-standardized rates – this represents a possible source of bias (11/50 states included in age standardised data for this reason). Data collected in early period of pandemic (pre-vaccine availability), therefore not necessarily generalisable over entire pandemic or post-vaccination periods. Data relies upon the accuracy of measurement and reporting of state reported data, including race/ethnicity and what constitutes a COVID-19 related death.. Data does not adjust for underlying co-morbidity therefore needs to be interpreted with caution |
| Factors associated with COVID-19 vaccine acceptance and hesitancy among residents of Northern California jails, Liu Y et al, 2021 (70)                                                                                               | U<br>S<br>A | Retrospective analysis of data | Inferred aim: to assess reasons for vaccine hesitancy, sources of COVID19 information and medical mistrust, investigated the association between COVID-19 vaccination and age, gender, race/ethnicity, recent flu vaccination, and housing type | Part of a pre-existing survey where 788 incarcerated people were included, 509 prisoners responded, questions about vaccinations added on 15 December 2020, data analysed up to 30 April 2021                                                                              | Santa Clara country electronic health record (EHR) used to gain information about people vaccinated in custody between 29 Jan 2021 and 30 June 2021, these records were then linked to survey results, part of ongoing survey on perceptions, attitudes and behaviours about COVID-19                                                           | Being in prison during the COVID-19 pandemic | 2584 prisoners offered vaccine, where 56.7% accepted at least one dose (1,464), acceptance increased with age 50+ (3.5 OR of vaccine acceptance compared to 18-29), men less likely to get covid vaccine (0.6 OR compared to females) , more likely to get vaccine if recent flu vaccine, vaccine uptake lower in black people (OR 0.7 compared to white people) but was not statistically significant, people in shared cells (OR 1.8) /dorms ( OR 2.3) more likely to get vaccinated when compared to those in single cells, of those vaccinated in jail 36.7% had previously declined, reasons for refusal, side effects(60%) , wanting to know more (38%), not thinking they needed it (23%), | Pre-print, not peer reviewed, excluded people who were in custody for less than 26 days (those cycling in and out may be a more vulnerable population), 1st/2nd/booster dose not documented, no comparison to the general population, no ethnical approval documented                                                                                                                                                                                                                                                                                                                                                                                                                                                                                                                                                                                                                 |

|                                                                                                                                                                                                                                                                                                                             |       |                                |                                                                                                                                                                                                                                                                                                     |                                                                                                                                                                                                                                                                            |                                                                                                                                                                                                                                                                                                                                                          |                                                                                                       |                                                                                                                                                                                                                                                                                                                                                                                                                                                                                                                                                                                                                                                                                                                                                                          |                                                                                                                                                                                                                                                                                                                                                                                                                                                                                                                                                                                                                                                                                            |
|-----------------------------------------------------------------------------------------------------------------------------------------------------------------------------------------------------------------------------------------------------------------------------------------------------------------------------|-------|--------------------------------|-----------------------------------------------------------------------------------------------------------------------------------------------------------------------------------------------------------------------------------------------------------------------------------------------------|----------------------------------------------------------------------------------------------------------------------------------------------------------------------------------------------------------------------------------------------------------------------------|----------------------------------------------------------------------------------------------------------------------------------------------------------------------------------------------------------------------------------------------------------------------------------------------------------------------------------------------------------|-------------------------------------------------------------------------------------------------------|--------------------------------------------------------------------------------------------------------------------------------------------------------------------------------------------------------------------------------------------------------------------------------------------------------------------------------------------------------------------------------------------------------------------------------------------------------------------------------------------------------------------------------------------------------------------------------------------------------------------------------------------------------------------------------------------------------------------------------------------------------------------------|--------------------------------------------------------------------------------------------------------------------------------------------------------------------------------------------------------------------------------------------------------------------------------------------------------------------------------------------------------------------------------------------------------------------------------------------------------------------------------------------------------------------------------------------------------------------------------------------------------------------------------------------------------------------------------------------|
| Health Management in Italian Prisons during COVID-19 Outbreak: A Focus on the Second and Third Wave Vella, R. ;Giuga, G. ;Piizzi, G. ;Alunni Fegatelli, D. ;Petrone, G. ;Tavone, A. M. ;Potenza, S. ;Cammarano, A. ;Mandarelli, G. ;Marella, G. L. 2022 (40)                                                                | Italy | Retrospective analysis of data | The stated aim of the study was "to evaluate the spread of the virus and the efficacy of the measures adopted in Italian prisons during the period from November 2020 to July 2021 and to compare the evolution of the pandemic between the Italian population and the Italian correctional system" | The study presented publicly available COVID-19 data covering the entirety of the Italian prison population, between 22/11/2020 and 28/06/2021. This data represented a monthly prison population ranging from 53,637 to 54,368 between these dates.                       | Data was collected from the publicly available Italian Ministry of Justice Website.                                                                                                                                                                                                                                                                      | Being in prison during the COVID-19 pandemic                                                          | The study reported a prevalence of SARS-CoV-2 infection among prisoners ranging from 0.19% to 1.94% (mean 1.02%, SD 0.51%) over the study period. The authors comment that the prevalence of confirmed COVID-19 cases were consistently lower in the prison population than in the general population, but no specific data surrounding COVID-19 prevalence in the general Italian population is presented. The study also notes a time lag on average of 1-2 weeks between peaks of infection rates in the general population and the prison population on cross-correlation time lag plot                                                                                                                                                                              | Population level study, with data covering entirety of prison system documented. Unclear how testing availability and policy varied between prison population and general population so lower COVID-19 prevalence described may be artefactual of this. Limited data regarding prevalence rates in general population presented (only for Police and administrative prison staff) so unable to verify authors conclusions of comparative rates. Data relies on accuracy of Italian government statistics. Raw vaccination dose administration numbers presented but no percentage calculation/rates so unable to make conclusions regarding uptake in prisoners versus general population. |
| Hospitalizations for COVID-19 Among US People Experiencing Incarceration or Homelessness Montgomery, M. P. ;Hong, K. ;Clarke, K. E. N. ;Williams, S. ;Fukunaga, R. ;Fields, V. L. ;Park, J. ;Schieber, L. Z. ;Kompaniyets, L. ;Ray, C. M. ;Lambert, L. A. ;D'Inverno, A. S. ;Ray, T. K. ;Jeffers, A. ;Mosites, E. 2022 (54) | USA   | Retrospective analysis of data | The study's relevant stated objective was to compare COVID-19 hospitalisations for people experiencing incarceration with hospitalisations among the general population                                                                                                                             | The study presented data from a cross section of 892 hospitals, private and public, across the USA between 01/04/2020 and 30/06/2021. The data represented 3415 people experiencing incarceration, and compared their data to 1,257,250 members of the general population. | Data was collected from a discharge summary database (Premier Healthcare Database Special COVID-19 Release) – People experiencing incarceration were defined by the use of specific admission codes and ICD-10 codes within the discharge summary. COVID-19 status was defined by ICD-10 primary or secondary diagnosis coding on the discharge summary. | Emergency Department attendance/ Hospital Admission from incarceration facilities during the pandemic | The study demonstrated a number of adverse outcomes associated with COVID-19 infection for people experiencing incarceration compared with the general population: higher rate of hospitalisation (2170 [63.5%]; P < .001), more likely to be hospitalised at a younger age (median age: 56 years IQR, 44-65 years), more likely to require invasive mechanical ventilation (aRR 1.16; 95% CI, 1.04-1.30) and more likely to die in hospital (aRR, 1.28; 95% CI, 1.11-1.47). People experiencing incarceration were also more likely to be readmitted to hospital for COVID-19 within 30 days of hospital discharge (aRR, 1.45; 95% CI, 1.18-1.78) and more likely to have a longer stay in hospital following admission (incidence rate ratio, 1.11; 95% CI, 1.06-1.16) | Large study covering geographically widespread area of United States, with detailed demographic analysis and comparison with general population. Risk ratios adjusted for multiple factors, including age, sex and underlying co-morbidities. The data relies entirely upon the accuracy of admission and discharge summary coding data. Strategy of specific read codes to identify incarcerated people may under-estimate true numbers. Authors note that duplicated results may occur for patients who have accessed care from multiple hospital facilities, although likely to be offset by large sample size.                                                                         |

|                                                                                                                                                                     |             |                                                                          |                                                                                                                                                                                           |                                                                                                                                                                                                                                                                                                                                                                    |                                                                                                                                                                                                                   |                                              |                                                                                                                                                                                                                                                                                                                                                                                                                                                                                                    |                                                                                                                                                                                                                                                                                                                                                                                                                                                                                                                                                                                                                                                                                                                                                                                                                                                                                                                                                                                                                                                                      |
|---------------------------------------------------------------------------------------------------------------------------------------------------------------------|-------------|--------------------------------------------------------------------------|-------------------------------------------------------------------------------------------------------------------------------------------------------------------------------------------|--------------------------------------------------------------------------------------------------------------------------------------------------------------------------------------------------------------------------------------------------------------------------------------------------------------------------------------------------------------------|-------------------------------------------------------------------------------------------------------------------------------------------------------------------------------------------------------------------|----------------------------------------------|----------------------------------------------------------------------------------------------------------------------------------------------------------------------------------------------------------------------------------------------------------------------------------------------------------------------------------------------------------------------------------------------------------------------------------------------------------------------------------------------------|----------------------------------------------------------------------------------------------------------------------------------------------------------------------------------------------------------------------------------------------------------------------------------------------------------------------------------------------------------------------------------------------------------------------------------------------------------------------------------------------------------------------------------------------------------------------------------------------------------------------------------------------------------------------------------------------------------------------------------------------------------------------------------------------------------------------------------------------------------------------------------------------------------------------------------------------------------------------------------------------------------------------------------------------------------------------|
| Implementation of a COVID-19 Infection Control Plan in a Large Urban Jail System<br>Qureshi, N. ;Cardenas, C. ;Tran, N. D. ;Henderson, S. O. 2022 (47)              | U<br>S<br>A | Longitudi<br>nal study<br>using<br>daily<br>collected<br>testing<br>data | The study aimed to review the cumulative incidence of COVID-19 in a jail system located in Los Angeles, California, USA as well as mitigation strategies put in place by the jail system. | The study presented data collected from the Los Angles jail system representing an average daily population of approximately 17,500 incarcerated residents and 33,921 unique people tested across 6 facilities between 07/03/2020 and 31/12/2020                                                                                                                   | Data was collected by extracting COVID-19 test data on a daily basis directly from the Correctional Health Services Electronic Health Record into a shared file available to the medical team in the jail system. | Being in jail during the COVID-19 pandemic   | The study demonstrated a cumulative COVID-19 incidence of 11.6% over the study period (3933/33921 unique people testing positive) SARS-CoV-2 positivity was significantly associated with the following demographics: Hispanic Ethnicity (aOR 1.67, 1.49-1.86 p<=.001), non-Hispanic Black Ethnicity (aOR 1.26, 1.11-1.42 p<=.001) Ethnicity designated as "other" (aOR 1.27, 1.04-1.56 p=.02), male sex (aOR 2.33, 2.03-2.67 p<=.001), and age ≥65 years (aOR 1.39, 1.08-1.79 p=.01)              | Small sample size in a very small geographic location. Regression results were adjusted for age, sex and race but not for underlying co-morbidity which may introduce bias. No comparison to general population, only within jail sex, ethnicity and race comparison documented so findings may be population effect rather than specific to jail facilities. Data from jail facilities not necessarily generalisable to other incarceration facilities (eg prison) due to the rapid turnover and transient nature of stays in jail facilities. Testing strategies within the jail system varied over time with mass asymptomatic testing being introduced as of 11/05/2020, so data may be unreliable with regard to case rates earlier in pandemic period The demographic of the jail system was heavily weighted towards male inhabitants (87.7%). The male inhabitants were also housed in multiple facilities whereas the female inhabitants were located in one facility only. The sex-based regression results therefore need to be interpreted with caution. |
| Indirect age- and sex-standardisation of COVID-19-related mortality rates for the prison population of England and Wales, 2021, I Braithwaite, C Edge, D Lewer (13) | U<br>K      | Report, retrospe<br>ctive<br>analysis<br>of data                         | Inferred aim: To estimate the standard mortality ratio of COVID-19 deaths among prisoners and to outline why early vaccination is necessary                                               | All data on prisoners in England and Wales, compared to all data from the general population, total sample size not noted, data collected from 1 March 2020 to 26 February 2021                                                                                                                                                                                    | Data for prison population collected from Offender Management Statistics Quarterly, published by HMPPS, community data collected from ONS, standard mortality ratio (SMR) calculated                              | Being in prison during the COVID-19 pandemic | 121 deaths in prisons, expected to be 36.3 given age and sex of the population, means that there is 3.3 SMR (CI 2.77-3.98) (3.3x more deaths in prisons than expected in the general population)                                                                                                                                                                                                                                                                                                   | Age and sex standardised, did not account for pre-existing morbidities, sensitivity analysis of the expected deaths calculated by looking at expected deaths in the 70+ age group                                                                                                                                                                                                                                                                                                                                                                                                                                                                                                                                                                                                                                                                                                                                                                                                                                                                                    |
| Injustice? Towards a better understanding of health care access challenges for prisoners, M. Davies, E. Keeble and R. Hutchings 2021 (57)                           | U<br>K      | Retrospe<br>ctive<br>analysis<br>of data                                 | Inferred aim: to analyse the health care services used by the prison population in England                                                                                                | Continuation on the report published by Nuffield trust in 2020, Locked out: prisoners' use of hospital care, reviews the literature and considers new areas: remote consultations, early impact of COVID-19 pandemic, different ethnic groups use of health services, improve understanding of people's health needs entering prison, data from 2016/17 to 2019/20 | Data from hospital episode statistics (HES) data, used postcode proxy for prison location and associated hospital activity linked to prisoners                                                                    | Being in prison during the COVID-19 pandemic | Early data suggests COVID has worsened prisoners' ability to access hospital services, start pandemic March 2020, 1,019 admissions to hospital by prisoners in England, lowest number admissions seen in any month in 2019/2020, cases related to cancer and GU healthcare eg dialysis were seen, only the most urgent cases were seen, the drop in elective activity in hospitals was a lot greater for prisoners than for those in the general population, vast increase in remote consultations | No quantitative comparisons to the general population, no statistically comparative analysis was done, demographics of prisoners were not included, as it was a continuation of a previous report, full methodology was not documented                                                                                                                                                                                                                                                                                                                                                                                                                                                                                                                                                                                                                                                                                                                                                                                                                               |

|                                                                                                                                                                                                                                                                |             |                                                                                                                                                                 |                                                                                                                                                                                                                                           |                                                                                                                                                                                                                                                                                                                                                                                                                                                                              |                                                                                                                                                                                                                                                                                                                                                                                                                                                                                                                                                                                                                                 |                                                                               |                                                                                                                                                                                                                                                                                                                                                                                                                                                                                                                                                              |                                                                                                                                                                                                                                                                                                                                                                                                                                                                                                                                                                                                                                                                                                                                                                                                                                 |
|----------------------------------------------------------------------------------------------------------------------------------------------------------------------------------------------------------------------------------------------------------------|-------------|-----------------------------------------------------------------------------------------------------------------------------------------------------------------|-------------------------------------------------------------------------------------------------------------------------------------------------------------------------------------------------------------------------------------------|------------------------------------------------------------------------------------------------------------------------------------------------------------------------------------------------------------------------------------------------------------------------------------------------------------------------------------------------------------------------------------------------------------------------------------------------------------------------------|---------------------------------------------------------------------------------------------------------------------------------------------------------------------------------------------------------------------------------------------------------------------------------------------------------------------------------------------------------------------------------------------------------------------------------------------------------------------------------------------------------------------------------------------------------------------------------------------------------------------------------|-------------------------------------------------------------------------------|--------------------------------------------------------------------------------------------------------------------------------------------------------------------------------------------------------------------------------------------------------------------------------------------------------------------------------------------------------------------------------------------------------------------------------------------------------------------------------------------------------------------------------------------------------------|---------------------------------------------------------------------------------------------------------------------------------------------------------------------------------------------------------------------------------------------------------------------------------------------------------------------------------------------------------------------------------------------------------------------------------------------------------------------------------------------------------------------------------------------------------------------------------------------------------------------------------------------------------------------------------------------------------------------------------------------------------------------------------------------------------------------------------|
| Is There a Temporal Relationship between COVID-19 Infections among Prison Staff, Incarcerated Persons and the Larger Community in the United States? D. Wallace, J. M. Eason, J. Walker, S. Towers, T. H. Grubestic and J. R. Nelson 2021 (52)                 | U<br>S<br>A | Retrospe<br>ctive<br>analysis<br>of data                                                                                                                        | Inferred aim: to present statistical evidence of the relationship between incarcerated people and staff infections in the federal bureau of Prisons (BOP) at the start of the pandemic in March to December 2020                          | 63/134 facilities were included in the analysis, data from 27 states, lots were excluded due to data reporting limitations, operational functions beyond incarceration and natural disasters, total number of prison population not documented, between 26 March 2020 and 31 December 2020                                                                                                                                                                                   | Data collected federal bureau of Prisons (BOP) COVID-19 dashboard, weekly populations of incarcerated people and quarterly prisoner-to-staff ratios by prisons, rate of active COVID-19 of incarcerated people, rate of active COVID-19 of staff, incidence rate of COVID-19 in the county surrounding                                                                                                                                                                                                                                                                                                                          | Being in prison during the COVID-19 pandemic                                  | Spikes in staff prevalence rate precede spikes in prisoners' prevalence rate, which was significant in lagged and logged prevalence rates, staff prevalence rate tends to be higher than the incarcerated people, every 1% increase in staff prevalence, associated 0.24% increase in prisoner prevalence rate, for every 1% increase in county prevalence associated 0.66% increase incarcerate population, when mask mandate came in only 0.84% decline in cases                                                                                           | Some demographic information about the counties prisons are situated in, however no demographic information about the prisoners, staff population was created by dividing population of incarcerated by staff to prisoner ratio so may not be reliable, many facilities excluded                                                                                                                                                                                                                                                                                                                                                                                                                                                                                                                                                |
| Life Expectancy and COVID-19 in Florida State Prisons Marquez, Neal M. M. P. H. ;Littman, Aaron M. MPhil J. D. ;Rossi, Victoria E. M. S. MPAff ;Everett, Michael C. B. A. ;Tyagi, Erika M. S. ;Johnson, Hope C. B. A. ;Dolovich, Sharon L. J. D. PhD 2022 (59) | U<br>S<br>A | Retrospe<br>ctive<br>analysis<br>of data                                                                                                                        | The study aimed to evaluate COVID-19 related deaths and the effect COVID-19 had on all-cause mortality/life expectancy of the incarcerated population in the state of Florida, USA compared with the general population within the state. | The study presented data from Florida state Department of Corrections (FLDOC), representing a population ranging from 84,086 to 95,769 over the study period (January 2019 to December 2020)                                                                                                                                                                                                                                                                                 | Data regarding the incarcerated population was collected from FLDOC Offender Based Information System (an electronic record system). Incarcerated population mortality data was extracted from FLDOC fiscal-year Inmate Mortality Report, with COVID-19 related deaths defined upon review of Death Certificate data, capturing COVID-19/SARS referenced within the first 5 causes of death.. Demographic information for the general population was taken from 2019 American Community Survey with mortality data and COVID-19 related death information taken from Florida Department of Health and CDC figures respectively. | Being in prison during the COVID-19 pandemic                                  | The study demonstrated that the standardised COVID-19 mortality rate for the incarcerated population was 4.45 times that of the general population (203.9 deaths per 100,000 - IRR=4.45, 95% CI=3.85, 5.15, p<0.001). COVID-19 contributed to a reduction of life expectancy in the incarcerated population of 4.2 years versus 1.5 years in the general population. In 2020, the standardised mortality rate of the incarcerated population was 626.9 deaths per 100,000 individuals versus 597.3 deaths per 100,000 individuals in the general population. | Large sample size restricted to small geographic location. COVID-19 related deaths defined differently within incarcerated population versus general population introducing bias. The demographic of the prison system was heavily weighted towards male inhabitants (94%) therefore data not necessarily generalisable. Testing strategy of varying facilities included in data not documented. No comparison to testing rates in general population therefore results may be artefactual of testing rates. Data relies upon accuracy of publicly available state reported information                                                                                                                                                                                                                                         |
| NCCHC Survey Yields Insights Into COVID-19 in U.S. Correctional Facilities, B. Gibson, 2020 (46)                                                                                                                                                               | U<br>S<br>A | Weekly survey of correctional facilities                                                                                                                        | Inferred aim: to collect data on how COVID-19 affected detention centres                                                                                                                                                                  | 514 facilities reporting data at least once, final survey received responses from 85 facilities, received cumulative data on 296, 574 prisoners, weekly survey sent out from March 2020 to June 2020 (9 weeks)                                                                                                                                                                                                                                                               | Data collected by National Commission on Correctional Health Care (NCCHC) and Researchers from Harvard Kennedy school and Harvard law school, data collected on cases and testing, and opportunity to share concerns, policy, procedures, and other info                                                                                                                                                                                                                                                                                                                                                                        | Being in prison during the COVID-19 pandemic                                  | Intake screening increased from 93-97% during study, screening of those incarcerated also increased from 46-56%, 17% positivity test out of 8127 compared to a positivity of 13% for CDC for general population, access to adequate testing reported only 64% at beginning and then rose to 92%, 3.5x prevalence of cases in black people compared to white people, 5.9x prevalence in Hispanic vs non Hispanic                                                                                                                                              | Also included juvenile detention centres, does not just focus on the adult jail population, positivity rate must be interpreted with caution, does not state why people were tested ie asymptomatic mass testing or symptomatic testing, no documentation about how OR was conducted for white vs black etc, CI not reported, no demographic details reported, no breakdown of results in study or in the appendices                                                                                                                                                                                                                                                                                                                                                                                                            |
| Older incarcerated persons' mental health before and during the COVID-19 pandemic DePalma, Alexandra ;Noujaim, Deborah ;Coman, Emil ;Wakefield, Dorothy ;Barry, Lisa C. 2022 (10)                                                                              | U<br>S<br>A | Longitudi<br>nal study<br>as part<br>of larger<br>pre-<br>establish<br>ed study,<br>via self-<br>reported<br>mental/p<br>hysical<br>health<br>measure<br>survey | The study aimed to determine the impact on mental and physical health of the COVID-19 pandemic on older incarcerated people                                                                                                               | The study presented baseline data collected partly from the established AGING INSIDE study collected pre-pandemic between 01/11/2017 and 31/01/2019, and partly from additional surveys taken as part of the AGING INSIDE check-in study collected mid-pandemic between 28/07/2020 and 20/09/2020. This data represented 157 incarcerated adults 50 years of age or older, resident within 8 institutions of the Connecticut Department of Correction (CTDOC). It represents | Surveys were sent out to residents already enrolled in the AGING INSIDE study. The survey measured PHQ-8, GAD-7 and a self-rated health (SRH) score of 1-5 (1=poor, 5= excellent). Results were compared with surveys taken prior to the pandemic as part of the AGEING INSIDE study                                                                                                                                                                                                                                                                                                                                            | Enrolled in the AGING INSIDE study and in prison during the COVID-19 pandemic | The study demonstrated that PHQ-8 depression scores (5.5 ± 6.0 vs 8.1 ± 6.5; p < 0.001) and GAD-7 scores (6.4 ± 5.7 vs 7.8 ± 6.6; p < 0.001) both increased during the COVID-19 pandemic compared to prior to it. A greater proportion of residents scored a clinically significant PHQ-8 score (≥10) during the COVID-19 pandemic compared to prior (38.2% versus 22.4%) Average SRH score worsened by -0.31 (p < 0.001) Causal mediation model results demonstrated that worsening PHQ-8 scores predicted worsening SRH rating (β = -0.040; p < 0.05)      | Very small study sample size in a very small geographical area No general population comparison, therefore unable to say if this result is specific to incarcerated adults or a general population effect. Self-reported PROs prone to repeat testing bias. Data only relevant to older adults and heavily weighted towards male residents (96%) therefore not necessarily generalisable to larger prison population.. Nearly 25% of eligible residents failed to respond to the survey. Although 77.7% of the already AGING INSIDE-enrolled patients responded, this in fact only represents 15.7% of the patients initially eligible for the AGING INSIDE study, therefore data should be interpreted with caution as a representation of the older adult population of the 8 Connecticut correctional institutions involved. |

|                                                                                                                                            |             |                                                             |                                                                                                                                                                                                                                        |                                                                                                                                                                                                                                                    |                                                                                                                                                                                                                                                                                                                                                                                                                                               |                                              |                                                                                                                                                                                                                                                                                                                                                                                                                                                                                                                                                                                                            |                                                                                                                                                                                                                                                                                                                             |
|--------------------------------------------------------------------------------------------------------------------------------------------|-------------|-------------------------------------------------------------|----------------------------------------------------------------------------------------------------------------------------------------------------------------------------------------------------------------------------------------|----------------------------------------------------------------------------------------------------------------------------------------------------------------------------------------------------------------------------------------------------|-----------------------------------------------------------------------------------------------------------------------------------------------------------------------------------------------------------------------------------------------------------------------------------------------------------------------------------------------------------------------------------------------------------------------------------------------|----------------------------------------------|------------------------------------------------------------------------------------------------------------------------------------------------------------------------------------------------------------------------------------------------------------------------------------------------------------------------------------------------------------------------------------------------------------------------------------------------------------------------------------------------------------------------------------------------------------------------------------------------------------|-----------------------------------------------------------------------------------------------------------------------------------------------------------------------------------------------------------------------------------------------------------------------------------------------------------------------------|
|                                                                                                                                            |             |                                                             |                                                                                                                                                                                                                                        | 77.7% of the prior enrollees of the AGING INSIDE study.                                                                                                                                                                                            |                                                                                                                                                                                                                                                                                                                                                                                                                                               |                                              |                                                                                                                                                                                                                                                                                                                                                                                                                                                                                                                                                                                                            |                                                                                                                                                                                                                                                                                                                             |
| Racial and ethnic inequalities in COVID-19 mortality within Texas carceral settings.N. Marquez, D. Moreno, A. Klonsky and S. Dolovich (62) | U<br>S<br>A | Retrospe<br>ctive<br>analysis<br>of data<br>(pre-<br>print) | Inferred aim: to investigate whether COVID-19 altered patterns of mortality for Black, Hispanic, and white individuals within the TDCJ population and if so, which groups were most heavily impacted                                   | Prisoners within the Texas department of criminal justice, average monthly population of 131 873, 454 total deaths, with 288 covid deaths, from 1 April 2019 to 31 March 2021                                                                      | Monthly population data collected from Texas department of criminal justice (TDCJ), where data was missing, linear interpolation was used, mortality data for prisoners taken Texas justice initiative, standardized all cause and covid mortality rates calculated adjusted for sex and age compared to pre-pandemic, model risk of mortality by race/ethnicity using a Bayesian model framework, white 20-34 females were baseline category | Being in prison during the COVID-19 pandemic | During pandemic period, standardised all-cause mortality across all races had increased by 85% over previous 12 months, COVID 19 accounts for more than 39% of deaths, all-cause mortality did not differ statistically between races, statistically significant covid-19 mortality for Black people was 1.6x and for Hispanic people was 2x greater than for White people. Adjusting for age and sex, relative to the White population, 1.67x for Black people and 1.96 times for Hispanic people                                                                                                         | Does not state how multiple calculations were made, females were baseline intercept for Bayesian regression models even though 92.15% of people in prison are male, no comprehensive demographic information,                                                                                                               |
| Risk Factors for SARS-CoV-2 in a Statewide Correctional System, B. S. Kennedy, R. P. Richeson and A. J. Houde, 2020 (45)                   | U<br>S<br>A | prevalen<br>ce study                                        | Inferred aim: to perform multivariate analyses to identify individual and facility-level risk factors associated with COVID 19 prevalence and outcomes in a state-wide correctional population that underwent nearly universal testing | Study based in Connecticut department of corrections (CTDOC), comprised of 17 facilities, by the end of the prevalence survey cumulative testing total 10,304, testing percentage of about 84%, data collection from 13 March 2020 to 26 June 2020 | Does not document how data was collected? symptom based and mass testing using PCR to detect covid, clinical outcomes of covid 19 monitored, plus hospitalisation, ICU admission and death, used multilevel multivariate logistic regression analysis used to identify risk factors, total number of people in prison obtained by daily census population at beginning of study                                                               | Being in prison during the COVID-19 pandemic | 13% men tested positive, no women tested positive, statistically significant RF for infection were dormitory housing, Hispanic or Latino ethnicity (compared to white), and older age, predictors of hospitalisation were heart disease and older age, dormitory housing was statistically protective for hospitalisation (? due to quantity of testing or sick inmates were identified and then housed in cells before testing and hospitalisation) autoimmune conditions, heart disease and age were predictors of ICU admission, Older age was the only predictor of death, 3.3 (CI 1.7-6.3) per decade | Missing prior asymptomatic cases before the mass testing regime may mean more people had COVID, mean age was 38, this may account for why certain RF were not statistically significant at predicting hospitalisation/ICU as prevalence of some chronic conditions were lower than other documented studies about prisoners |



|                                                                                                                                                                                                                                                                                                                                                                                                                      |                            |                                   |                                                                                                                                                                                                                 |                                                                                                                                                                                                                                                                                                                                     |                                                                                                                                                                                                                                                                                                                                                                                                                                |                                                                   |                                                                                                                                                                                                                                                                                                                                                                                                                                                                                                                                                                                                                                       |                                                                                                                                                                                                                                                                                                                                                                                                                                                                                                                                                                                                                                                                                                                                                                                                                                                                                                                                                                                              |
|----------------------------------------------------------------------------------------------------------------------------------------------------------------------------------------------------------------------------------------------------------------------------------------------------------------------------------------------------------------------------------------------------------------------|----------------------------|-----------------------------------|-----------------------------------------------------------------------------------------------------------------------------------------------------------------------------------------------------------------|-------------------------------------------------------------------------------------------------------------------------------------------------------------------------------------------------------------------------------------------------------------------------------------------------------------------------------------|--------------------------------------------------------------------------------------------------------------------------------------------------------------------------------------------------------------------------------------------------------------------------------------------------------------------------------------------------------------------------------------------------------------------------------|-------------------------------------------------------------------|---------------------------------------------------------------------------------------------------------------------------------------------------------------------------------------------------------------------------------------------------------------------------------------------------------------------------------------------------------------------------------------------------------------------------------------------------------------------------------------------------------------------------------------------------------------------------------------------------------------------------------------|----------------------------------------------------------------------------------------------------------------------------------------------------------------------------------------------------------------------------------------------------------------------------------------------------------------------------------------------------------------------------------------------------------------------------------------------------------------------------------------------------------------------------------------------------------------------------------------------------------------------------------------------------------------------------------------------------------------------------------------------------------------------------------------------------------------------------------------------------------------------------------------------------------------------------------------------------------------------------------------------|
| SARS-CoV-2 among inmates aged over 60 during a COVID-19 outbreak in a penitentiary complex in Brazil: Positive health outcomes despite high prevalence Gouvea-Reis, F. A. ;Borja, L. S. ;Dias, P. O. ;Silva, D. C. S. ;Percio, J. ;Peterka, C. ;Silva, G. O. ;Adjuto, R. N. P. ;Tavares, G. B. ;Cunha, M. B. ;Feres, C. ;de Oliveira, J. ;Sodré, G. ;dos Santos, W. ;de Moraes, C. 2021 (63)                         | B<br>r<br>a<br>z<br>il     | Outbreak Report                   | The stated aim of the project was "To assess SARS-CoV-2 prevalence and health outcomes among inmates over 60 years during a COVID-19 outbreak in a major penitentiary complex in the Federal District, Brazil." | The study presented data from a single penitentiary complex in the Federal District of Brazil. Result of a mass testing programme of residents aged ≥60 years of age performed on 13/05/2020 are reported along with interviews to ascertain symptom status of the tested patients. The data represented 159 incarcerated subjects. | Data was collected partly from direct testing results (PCR for symptomatic patients, antibody testing for asymptomatic testing) and from direct resident interviews for symptom status.                                                                                                                                                                                                                                        | Being in prison and ≥60 years of age during the COVID-19 pandemic | The study reported 0% mortality rate in the sampled population. Per reported general population data for the Federal District of Brazil, this is lower than expected – per positive test numbers in the penitentiary, the following numbers of deaths per age group would be expected: 60-69 = 6.032 deaths, 70-79 = 2.875 deaths , 80+ = 1.38 deaths                                                                                                                                                                                                                                                                                 | Very small sample size in a very small geographical area. 0% mortality likely to be due to chance given small sample size – no statistical analysis to ascribe statistical significance to the data. No adjustment for underlying co-morbid status.. Mixed testing methods, antibody testing methods less reliable than PCR testing. Unclear with antibody testing when exactly exposure to COVID-19 had occurred. Assumed to be whilst incarcerated. Possible that PCR negative symptomatic patients may have been positive on antibody testing if previously infected, but would be captured as negative test results                                                                                                                                                                                                                                                                                                                                                                      |
| SARS-CoV-2 seroprevalence in the adult detainees of the Paris area in 2021: A multicenter cross-sectional study Mellon, Guillaume ;Rouquette, Alexandra ;Fac, Catherine ;Carton, Béatrice ;Cordonnier, François ;David, Emmanuelle ;Goutte, Béatrice ;Heulin, François ;Kanoui, Valérie ;Levasseur, Ludovic ;Racle, Pascale Benjamin ;Nehri, Kawther ;Dulioust, Anne ;Roque-Afonso, Anne-Marie; Silberman, 2022 (43) | F<br>r<br>a<br>n<br>c<br>e | Multicenter cross-sectional study | The inferred aim was to estimate SARS-CoV-2 seroprevalence in the incarcerated population of Paris                                                                                                              | The study presented data from a cross section of 1044 residents (out of 11,413 total incarcerated people) from 12 incarceration facilities in the Paris region of France from 14/01/2021 to 08/07/2021                                                                                                                              | Data was collected via Elecsys® Anti-SARS-CoV-2 N and Elecsys® Anti-SARS-CoV-2 S immunoassays collected directly from study participants measuring qualitative anti-nucleoprotein antibodies reactivity and quantitative anti-spike protein receptor binding domain antibody levels. General population prevalence in the Paris region collected from publicly available data at Géodonnées en Santé Publique (GÉODES) website | Being in prison during the COVID-19 pandemic                      | 18.2% (95% CI, 16.9 to 19.4) of incarcerated population, adjusted for age/sex, were seropositive over the entire study period. Over the week 08-14/02/2021 incarcerated population seropositivity was 18.4% (95% CI, 16.8 to 20.1) compared with 20.6% (95% CI, 16.6 to 24.9) in the general Paris population. Amongst male residents statistically significant factors independently associated with seropositivity were lower number of cigarettes per day (p < 0.0001) and higher number of inmates per cell (p=0.0008) In female residents, factors were younger age (p=0.0002) and lower number of cigarettes per day (p=0.0216) | Small sample size over small geographical area. Cross sectional sample of 9.1% of incarcerated population may lead to bias in extrapolating to entire incarcerated population. Low proportion of females involved compared to males (198v816) therefore results not necessarily generalisable. Seroprevalence positivity not necessarily related to within prison infection – initial infection may have occurred whilst in community. Unclear how effective antibody measurement alone is in assessing true previous infection and unclear how previous vaccination might affect results (although only 6.5% participants reported prior vaccination) Study voluntary with high number of refusals to participate (920/3545), therefore results may be biased by differing behaviours in residents choosing to participate. Not documented how seroprevalence measured in community – also likely differing demographics in community so comparison data should be interpreted with caution |

|                                                                                                                                                                                                                                                       |                                                     |                                        |                                                                                                                                                                                                                |                                                                                                                                                                                                                                                                                                                         |                                                                                                                                                                                                                                                                                                        |                                                   |                                                                                                                                                                                                                                                                                                                                                                                                                                                                                                                                                                                                                                                                                     |                                                                                                                                                                                                                                                                                                                                                                                                                                                                                                                                                                                                                                                                                                                                                                                                                                                                                                                                                                                                                                                                                                                                             |
|-------------------------------------------------------------------------------------------------------------------------------------------------------------------------------------------------------------------------------------------------------|-----------------------------------------------------|----------------------------------------|----------------------------------------------------------------------------------------------------------------------------------------------------------------------------------------------------------------|-------------------------------------------------------------------------------------------------------------------------------------------------------------------------------------------------------------------------------------------------------------------------------------------------------------------------|--------------------------------------------------------------------------------------------------------------------------------------------------------------------------------------------------------------------------------------------------------------------------------------------------------|---------------------------------------------------|-------------------------------------------------------------------------------------------------------------------------------------------------------------------------------------------------------------------------------------------------------------------------------------------------------------------------------------------------------------------------------------------------------------------------------------------------------------------------------------------------------------------------------------------------------------------------------------------------------------------------------------------------------------------------------------|---------------------------------------------------------------------------------------------------------------------------------------------------------------------------------------------------------------------------------------------------------------------------------------------------------------------------------------------------------------------------------------------------------------------------------------------------------------------------------------------------------------------------------------------------------------------------------------------------------------------------------------------------------------------------------------------------------------------------------------------------------------------------------------------------------------------------------------------------------------------------------------------------------------------------------------------------------------------------------------------------------------------------------------------------------------------------------------------------------------------------------------------|
| Seroprevalence And Risk Factors For Sars-Cov-2 Among Incarcerated Adult Men In Quebec Kronfli, N. ;Dussault, C. ;Maheu-Giroux, M. ;Halavrezos, A. ;Chalifoux, S. ;Sherman, J. P. ;Park, H. ;Balso, L. D. ;Cheng, M. P. ;Poulin, S. ;Cox, J. 2022 (44) | C<br>a<br>n<br>a<br>d<br>a                          | Multi-centre cross sectional study     | The stated aim was to assess "the seroprevalence of SARS-CoV-2 antibodies among people incarcerated in Quebec provincial prisons and determine the effects of carceral exposures on SARS-CoV-2 seropositivity" | The study presents data from a cross section of 1100 residents (out of 2170 incarcerated people invited to participate with a total documented capacity of 2528 over the three facilities) from 12 incarceration facilities in the Quebec region of Canada from 19/01/2021 to 15/09/2021                                | Demographic data collected via self-completed questionnaire. Seroprevalence data collected Roche Elecsys anti-SARS-CoV-2 serology test detecting immunoglobulin G antibodies.<br><br>Comparison data from general population sourced from publicly available data at Hema-Quebec website               | Being in prison/jail during the COVID-19 pandemic | 22% of participants were seropositive over the study period. This compared with 13.75% in the comparative general population sample of Montreal blood donors.. Factors with a statistically significant association with seropositivity were: time spent incarcerated ("most time": aPR, 1.47; 95% CI, 1.01–2.12; "all time": aPR, 2.17; 95% CI, 1.53–3.07), employment during incarceration (aPR, 1.64; 95% CI, 1.28–2.11), shared meal consumption during incarceration ("with cellmates": aPR, 1.46; 95% CI, 1.08–1.97; "with sector": aPR, 1.34; 95% CI, 1.03–1.74), and incarceration post in-prison outbreak (aPR, 2.32; 95% CI, 1.69–3.18) (aPR = adjusted prevalence ratio) | Small sample size over small geographical area. Study presents data for males only, Unclear how effective antibody measurement alone is in assessing true previous infection as duration of measurable antibody levels unclear and liable to vary between individuals. Seroprevalence positivity not necessarily related to within prison infection – initial infection may have occurred whilst in community. Both Prison and Jail type facilities included in sample – so data not necessarily comparable to other facilities given due to the rapid turnover and transient nature of stays in jail facilities. Comparison data for general population taken from Montreal blood donors, therefore comparison results should be interpreted with caution – unclear method of detection of seroprevalence in this group. Outbreaks of COVID-19 occurred within all included prisons during the study period - results should therefore be interpreted with caution.. 49% of invited individuals declined, introducing potential selection bias. Self-completed question may introduce response bias. Convenience sampling – not randomised |
| Suicide attempts and Covid-19 in prison: Empirical findings from 2016 to 2020 in a Swiss prison, L. Getaz, H. Wolff, D. Golay, P. Heller and S. Baggio, 2021 (76)                                                                                     | S<br>w<br>i<br>t<br>z<br>e<br>r<br>i<br>a<br>n<br>d | Report, retrospective analysis of data | To investigate whether the occurrence of suicide attempts had increase during the pandemic compared to pre-pandemic                                                                                            | Prisoners in Switzerland and documented suicide attempts, sample size not documented data collected from 2016-2019 (pre-pandemic) and then in 2020 (pandemic period)                                                                                                                                                    | Retrospective data collection from nursing records of self-harm events, trained physician reviewed these to identify suicide attempts,                                                                                                                                                                 | Being in prison during the COVID-19 pandemic      | 1.57 RR of suicide attempts in 'pandemic period' compared to 'pre pandemic', 1.57 RR of self-harm events in 'pandemic period' compared to 'pre-pandemic' period, even though the prison population had decreased in this time which normally correlates to a reduction in suicide attempts                                                                                                                                                                                                                                                                                                                                                                                          | 'Pandemic period' included some data from pre pandemic as data was collected annually, no documentation of how calculations were calculated or crude numbers, no demographic data, reasons for suicide attempts not documented                                                                                                                                                                                                                                                                                                                                                                                                                                                                                                                                                                                                                                                                                                                                                                                                                                                                                                              |
| Surveillance of COVID-19 outbreaks in prisons in the US South: The role of economic distress in the communities surrounding prison facilities Gu, M. ;Pro, G. ;Zaller, N. 2022 (48)                                                                   | U<br>S<br>A                                         | Retrospective review of data           | The stated aim was "to assess the association between county economic distress and prison COVID-19 outbreaks in southern US states"                                                                            | The study presents data from 570 prisons within the US states of Alabama, Florida, Georgia, Kentucky, Louisiana, Missouri, Mississippi, North Carolina, South Carolina, Tennessee, Texas, Virginia, and West Virginia collected between May 2019 and May 2020. Total number of incarcerated residents was not reported. | Data was collected from The Covid Prison Project, a publicly available source aggregated daily from prison systems and media reports. Economic Distress was demonstrated via the DCI score, a composite county-level score from 2015-2019 data corresponding to counties surrounding prison facilities | Being in prison during the COVID-19 pandemic      | The study demonstrated significant associations between COVID-19 prison outbreaks and rurality (aRR, 1.35 CI, 1.06-1.73) p=0.02), increased DCI score i.e. higher economic distress (1.02 CI, 1.01-1.03 p <0.0001), % African American (0.069 CI, 0.011-0.42 P=0.004), %, Hispanic/Latino (0.11 CI, 0.013-0.94 p=0.04) (aRR = adjusted rate ratio)                                                                                                                                                                                                                                                                                                                                  | Large geographical area with probable large sample size (although exact number not documented). Short, early period of pandemic period captured in data. Little data on individual facilities themselves or documentation of number of incarcerated residents captured by data. Results dependent on quality of prison level COVID reporting – testing strategies likely not uniform and may have changed over study period. Authors note that if 0 documented as number of daily cases in data, unclear whether this was a lack of reporting or a lack of cases – as such older cases reported in summation on a single day may have met criteria for an outbreak, when in reality this is an artefact of delayed reporting. COVID Prison project uses automatic data capture techniques                                                                                                                                                                                                                                                                                                                                                   |

|                                                                                                                                                                                                                                           |                                 |                                                                                                 |                                                                                                                                                                                                                                                                        |                                                                                                                                                                                                  |                                                                                                                                                                                                                                                               |                                                                   |                                                                                                                                                                                                                                                                                                                                                                                                                                                                                                                                                                                                                                                                                                                                                                                                                                                                                                                                                                  |                                                                                                                                                                                                                                                                                                                                                                                                                                                                                                                                                                                                                                                                                                                                                                                                                                                                                           |
|-------------------------------------------------------------------------------------------------------------------------------------------------------------------------------------------------------------------------------------------|---------------------------------|-------------------------------------------------------------------------------------------------|------------------------------------------------------------------------------------------------------------------------------------------------------------------------------------------------------------------------------------------------------------------------|--------------------------------------------------------------------------------------------------------------------------------------------------------------------------------------------------|---------------------------------------------------------------------------------------------------------------------------------------------------------------------------------------------------------------------------------------------------------------|-------------------------------------------------------------------|------------------------------------------------------------------------------------------------------------------------------------------------------------------------------------------------------------------------------------------------------------------------------------------------------------------------------------------------------------------------------------------------------------------------------------------------------------------------------------------------------------------------------------------------------------------------------------------------------------------------------------------------------------------------------------------------------------------------------------------------------------------------------------------------------------------------------------------------------------------------------------------------------------------------------------------------------------------|-------------------------------------------------------------------------------------------------------------------------------------------------------------------------------------------------------------------------------------------------------------------------------------------------------------------------------------------------------------------------------------------------------------------------------------------------------------------------------------------------------------------------------------------------------------------------------------------------------------------------------------------------------------------------------------------------------------------------------------------------------------------------------------------------------------------------------------------------------------------------------------------|
| Testing lags and emerging COVID-19 outbreaks in federal penitentiaries: A view from Canada, Blair, A. Parnia, A. Siddiqi, A. 2020 (53)                                                                                                    | C<br>a<br>n<br>a<br>d<br>a      | Retrospe<br>ctive<br>analysis<br>of data<br>(pre-<br>print)                                     | To summarise and compare the prevalence of testing, test positivity, COVID-19 prevalence, case fatality and proportion of recovered cases within prisons in Canada, by province and for Canada overall and to contrast them within the general provincial jurisdiction | 51 facilities in Canada were analysed (after grouping of some systems), data analysed from 50 of these, total sample size not documented, 189 confirmed cases, data analysed up to 21 April 2020 | Using publicly available data from Correctional Service of Canada for prison population, population numbers were estimates, general population data from COVID-19 Canada outbreak tracker resource hub and Statistics Canada estimates 2020 for first quarter | Being in prison during the COVID-19 pandemic                      | 12/50 had no testing at all, 36/50 had fewer tests than the general population, those with higher testing levels tended to be those who had a high COVID-19 prevalence, overall had 34/1000 number of tests in prisons compared to 16/1000 in general population, COVID-19 prevalence 1.2% in prisons compared to 0.1% in general population, case fatality estimate of 0.5% in prisons compared to 0.3% in general population, again must be interpreted with caution due to underestimation of true case numbers, COVID-19 prevalence higher among women's prisons                                                                                                                                                                                                                                                                                                                                                                                             | Clear documentation of how outcomes were measured, breakdown in comparison to provinces in Canada, not particularly useful for WCEC, denominators for prison population likely to be inaccurate due to it being an estimate based on maximum occupancy, only 2 months of data looking at beginning of pandemic, case fatality estimate not standardised                                                                                                                                                                                                                                                                                                                                                                                                                                                                                                                                   |
| The Impact Of COVID-19 On The Health Of Incarcerated Older Adults In California State Prisons Kwan, A. ;Garcia-Grossman, I. ;Sears, D. ;Bertozzi, S. M. ;Williams, B. A. 2022 (50)                                                        | U<br>S<br>A                     | Retrospe<br>ctive<br>review of<br>data                                                          | The stated aim was to describe COVID-19 outcomes in older adults within the California State Prisons and compare their risk of adverse health outcomes with the general prison population                                                                              | The study presents data representing 148,488 incarcerated residents from 35 prison institutions within California state, USA taken from 01/03/2020 to 09/10/2021                                 | Data was collected from California Correctional Health Care Services (CCHCS) electronic records, a source aggregated from electronic health records and the prisons' internal registries.                                                                     | Being in prison and >55 years of age during the COVID-19 pandemic | The study noted that, relative to adults <55 years old), older adults had a higher rate of confirmed cases of COVID-19 (aOR: 1.25 ages 55–64, 1.39 ages 65–74, 1.40 age ≥75) and a higher rate of COVID-19 testing (aOR: 1.21 ages 55–64, 1.36 ages 65–74, 1.93 age ≥75). Of incarcerated residents with confirmed COVID-19 cases, older adults had higher rates of hospitalization with COVID-19 (aOR: 4.59 ages 55–64, 8.67 ages 65–74, and 15.10 age ≥75), higher rates of Emergency Department attendance (aOR: 3.44 ages 55–64, 5.95 ages 65–74, and 11.69 age ≥75), higher rates of ITU admission (aOR: 8.09 ages 55–64, 15.47 ages 65–74, 19.48 age ≥75) and higher rates of COVID-19-related death (aOR: 9.61 ages 55–64, 26.40 ages 65–74, 61.89 age ≥75) Older adults were also found to have higher rates of vaccination compared with adults <55 years (aOR: 1.73 ages 55–64, 2.01 ages 65–74, 1.93, age ≥75) (aOR = adjusted odds ratio, p < 0.001) | Large sample size in single US state. Results reliant on accuracy of electronic health documents and Prison internal registries. High proportion of males compared to females in study data (95.29%) Little data on individual facilities themselves, and testing strategies within prisons e.g. - whether older residents were prioritised for testing – results may be artefactual of such policies. No documented general population comparison, therefore unable to say if this result is specific to incarcerated older adults or a general population effect                                                                                                                                                                                                                                                                                                                        |
| Vaccination against SARS-CoV-2 infection among vulnerable and marginalised population groups in Denmark: A nationwide population-based study. Nilsson SF, Laursen TM, Osler M, Hjorthøj C, Benros ME, Thelberg S, Nordentoft M. 2022 (68) | D<br>e<br>n<br>m<br>a<br>r<br>k | Populati<br>on<br>based<br>Cohort<br>study<br>using<br>retrospe<br>ctive<br>analysis<br>of data | to study the rates of SARS-CoV-2 vaccination in among vulnerable and marginalised high-risk groups                                                                                                                                                                     | Study assessed (in addition to other high risk groups) total national prison population of Denmark, as part of a 4,277,380 total cohort size between 27/02/2020 to 15/10/2021                    | Third party data on imprisonments was obtained from the Danish Central Criminal Register, 1991-2020, and information on imprisonment was included for the period 2018-2020. Vaccination data accessed from The Danish Vaccination Register                    | Being in prison during the COVID-19 pandemic                      | Prison population half as likely to complete full course of COVID19 vaccination than the general population (aIRR 0.5 95% CI 0.5-0.5)                                                                                                                                                                                                                                                                                                                                                                                                                                                                                                                                                                                                                                                                                                                                                                                                                            | Large sample size including the entirety of the Danish general and prison population. Third party data only. Appropriate statistical analysis with IRRs calculated using poisson regression analysis adjusted for calendar year, age and sex stratified by sex and additionally for nationality. Note population data may include some citizens aged 15-18 but prison population aged 15-18 likely to be negligible based on separately reported prison demographics. Demographics including country of origin, age, and SARS-CoV-2 and sex of the prison population documented. Discussion focussed on homeless population, very limited discussion around prison population. No data/discussion exploring reasons behind reduced uptake in prison population so minimal generalisable takeaways to inform policy – accepted however that this is likely outside the scope of this study |

|                                                                                                                                                                                      |        |                                              |                                                                               |                                                                                                                                                                   |                                                                                                                        |                                              |                                                                                                                                                                                                                                |                                                                                                                                                                                                                                                                                                                     |
|--------------------------------------------------------------------------------------------------------------------------------------------------------------------------------------|--------|----------------------------------------------|-------------------------------------------------------------------------------|-------------------------------------------------------------------------------------------------------------------------------------------------------------------|------------------------------------------------------------------------------------------------------------------------|----------------------------------------------|--------------------------------------------------------------------------------------------------------------------------------------------------------------------------------------------------------------------------------|---------------------------------------------------------------------------------------------------------------------------------------------------------------------------------------------------------------------------------------------------------------------------------------------------------------------|
| Vaccination for SARS-CoV-2 and risk of COVID disease among those in prison care in Scotland, Public health Scotland, 2021, Wilkinson M, Yeung A, Hutchinson S. Unpublished work (67) | U<br>K | Unpublished report by Public Health Scotland | No specific aim mentioned, contains vaccination data of prisoners in Scotland | 7348 adult prisoners in Scotland were matched with up to 10 controls from the general population, data collected from beginning of pandemic up to 11 January 2022 | Information sourced from Scottish Prison Service (SPS), data for controls sourced from Community Health Index Database | Being in prison during the COVID-19 pandemic | 74% of prisoners had first dose compared to 72% in general population, 63% of prisoners had 2 doses of the vaccine compared to 68% in the general population, 31% prisoners had booster compared to 38% in general population, | Up to ten controls were sampled from the CHI database matched for the age, sex, Scottish Index of Multiple Deprivation (SIMD) quintile and past SARS-CoV-2 diagnosis of individuals in prison, did not include pre-existing conditions, did not state what priority group the prisoners or matched controls were in |
|--------------------------------------------------------------------------------------------------------------------------------------------------------------------------------------|--------|----------------------------------------------|-------------------------------------------------------------------------------|-------------------------------------------------------------------------------------------------------------------------------------------------------------------|------------------------------------------------------------------------------------------------------------------------|----------------------------------------------|--------------------------------------------------------------------------------------------------------------------------------------------------------------------------------------------------------------------------------|---------------------------------------------------------------------------------------------------------------------------------------------------------------------------------------------------------------------------------------------------------------------------------------------------------------------|
